# Supplementary material for: Early stages of sympatric homoploid hybrid speciation in crater lake cichlid fishes
Source: PubMed Central journal article supplement (PMC9537415; doi:10.1038/s41467-022-33319-4), 2022-10-06
Supplement: 41467_2022_33319_MOESM1_ESM.pdf [file 41467_2022_33319_MOESM1_ESM.pdf]

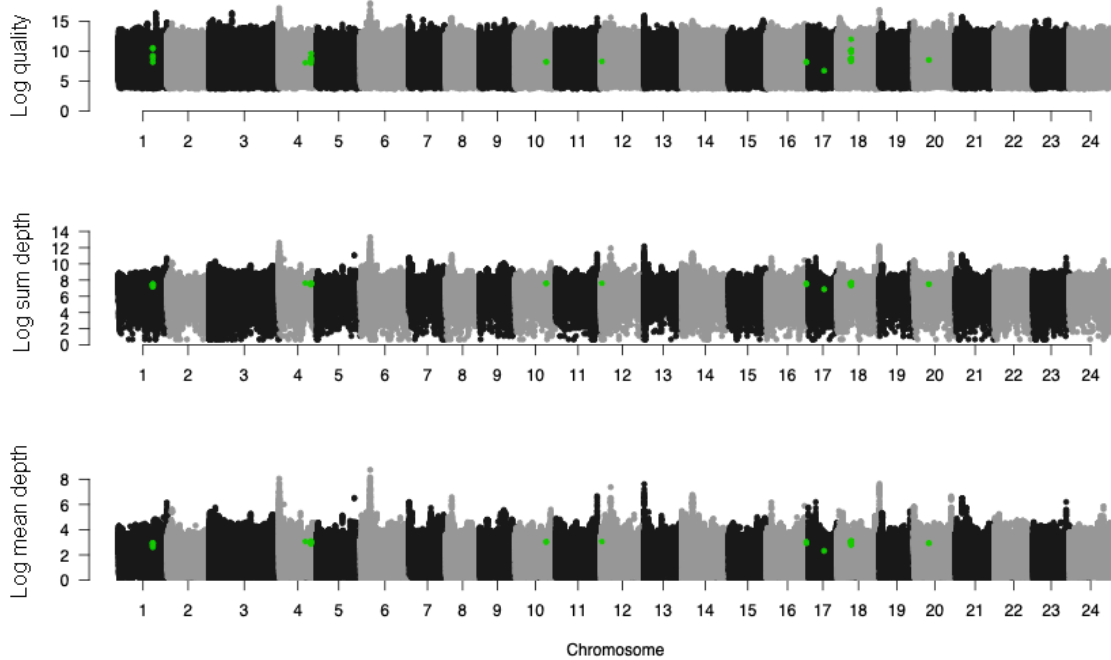

Supplementary Fig. 1: Manhattan plots showing information obtained with vcfTools (using all Midas in CL Xiloá, n=95, shown in log scale) including per site SNP quality (--site-quality, QUAL), depth per site summed across all individuals (--site-depth, SUM\_DEPTH) and the mean in depth per site averaged across all individuals (--site-mean-depth, MEAN\_DEPTH). Green dots are sites found as private SNPs in hybrids (n=11, frequency cut off = 0.5, see also Supplementary Table 3). Source Data is provided in Source Data file 2.

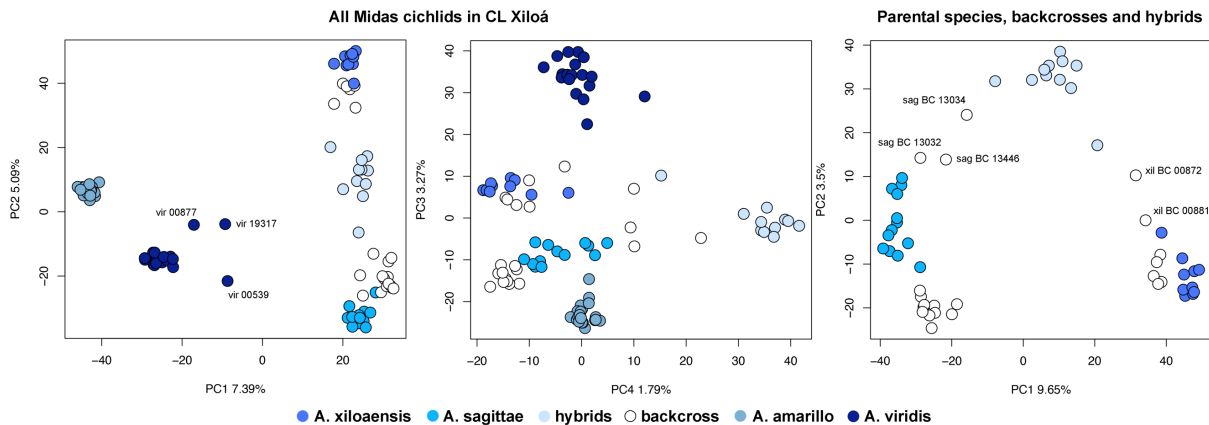

Supplementary Fig. 2: First two plots on the left are 2D scatter plots using genetic PC1-2 and PC3-4, respectively, based on 175,942 SNPs for all four Midas cichlid species and hybrids in CL Xiloá (3D plots shown in Fig. 1 a-b in the main manuscript). 2D PCA based on only parental species *A. sagittae* and *A. xiloaensis*, hybrids, and backcrosses is presented on the right. IDs of three *A. viridis* that deviate from the species cloud and five backcrosses closer to hybrids are shown. Source data are provided as Source Data file 1.

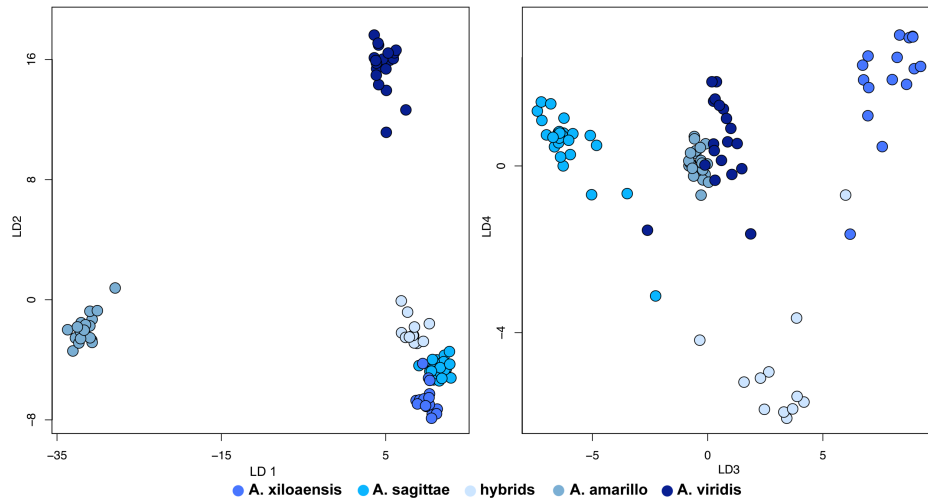

Supplementary Fig. 3: Scatter plot of LD1 - LD2 (left) and L3 – LD4 (right) scores obtained from a linear discriminant function based on genomic data (175,942 SNPs) including the two parental species and their backcrosses, hybrids and the remaining two Midas cichlid species in CL Xiloá. Source data are provided as Source Data file 1.

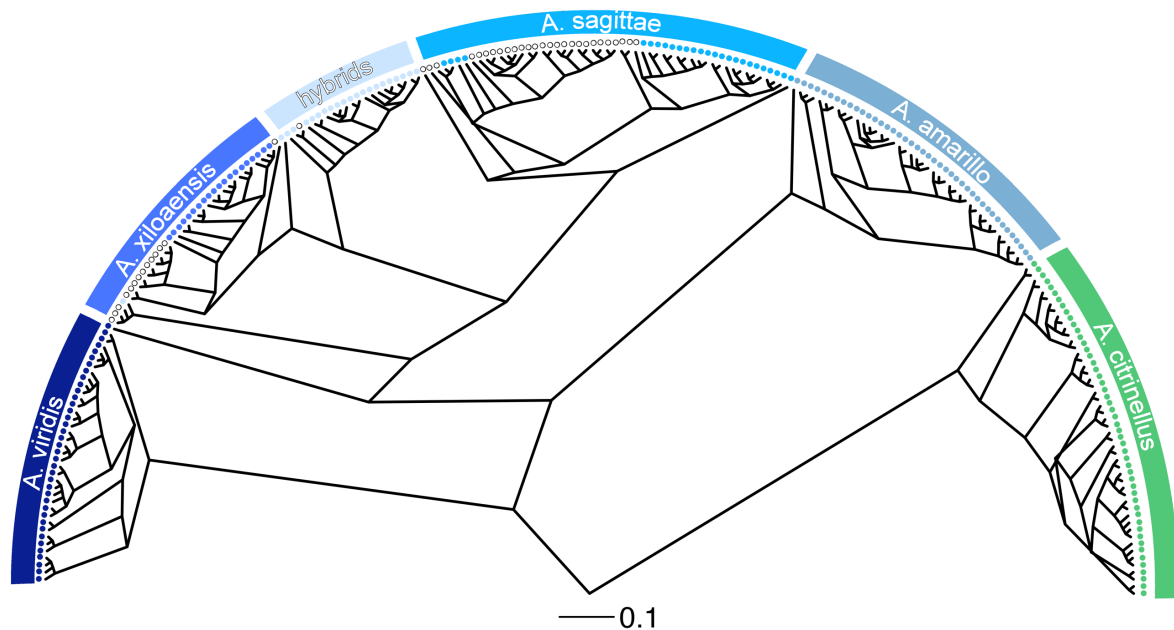

Supplementary Fig. 4: Neighbor joining tree based on 88,369 SNPs and 240 alleles (extracted from 120 diploid individuals). Colored circles on the tips represent individuals per species as classified in clade legends, as well as backcrosses in white. One haplotype of the xiloensis backcross 13034 is nested within the hybrid clade, and one haplotype of hybrid 00882 is nested within pure *A. xiloensis*. Source Data is provided in Source Data file 2.

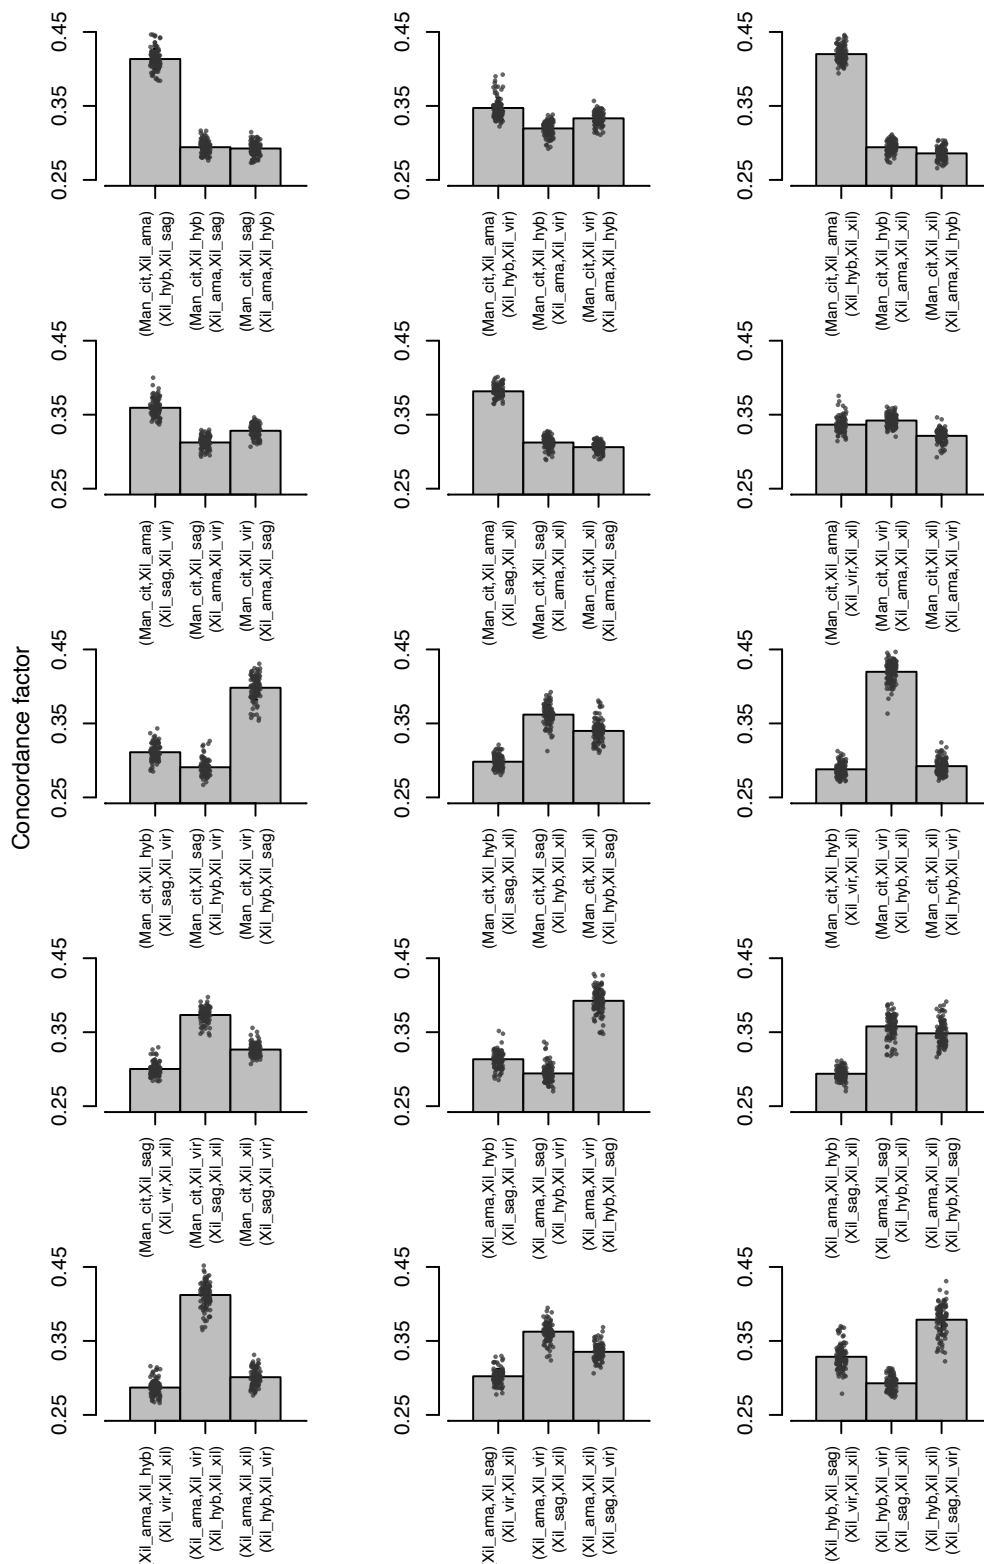

Supplementary Fig. 5: Mean concordance factors (CF = proportion of genome wide SNPs recovering each of the three possible alternative topologies for a given species quartet) based on 100 individual quartets with 88,369 SNPs for all 15 possible quartets in Midas cichlids in CL Xiloá and one outgroup. Individual data points are shown on the bars. Abbreviations: Xil\_xil = *A. xiloaensis*; Xil\_sag = *A. sagittae*; Xil\_hyb = hybrids; Xil\_vir = *A. viridis*; Xil\_ama = *A. amarillo*; Man\_cit = *A. citrinellus* (outgroup). Source data are provided as Source Data file 1.

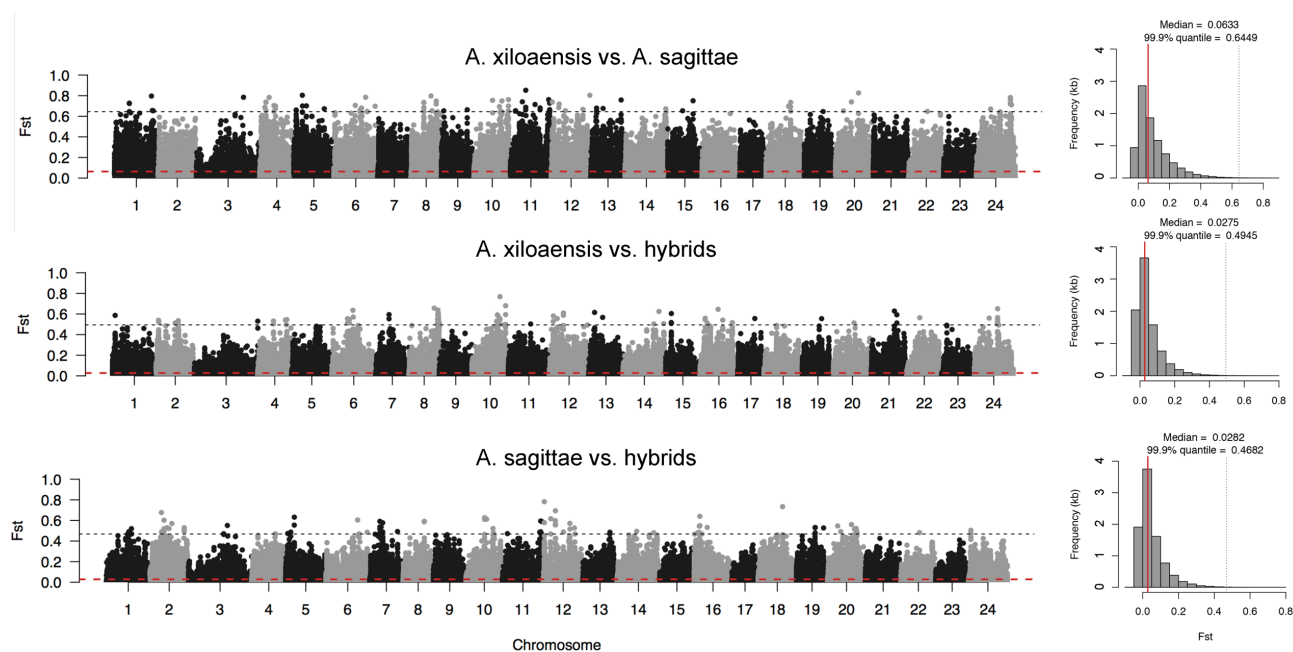

Supplementary Fig. 6:  $F_{st}$  calculation along the genome based on 10-kb windows. The median and 99.9% quantiles are shown by the red and black dotted lines, respectively. Source data are provided in vcf format in Source Data file 2.

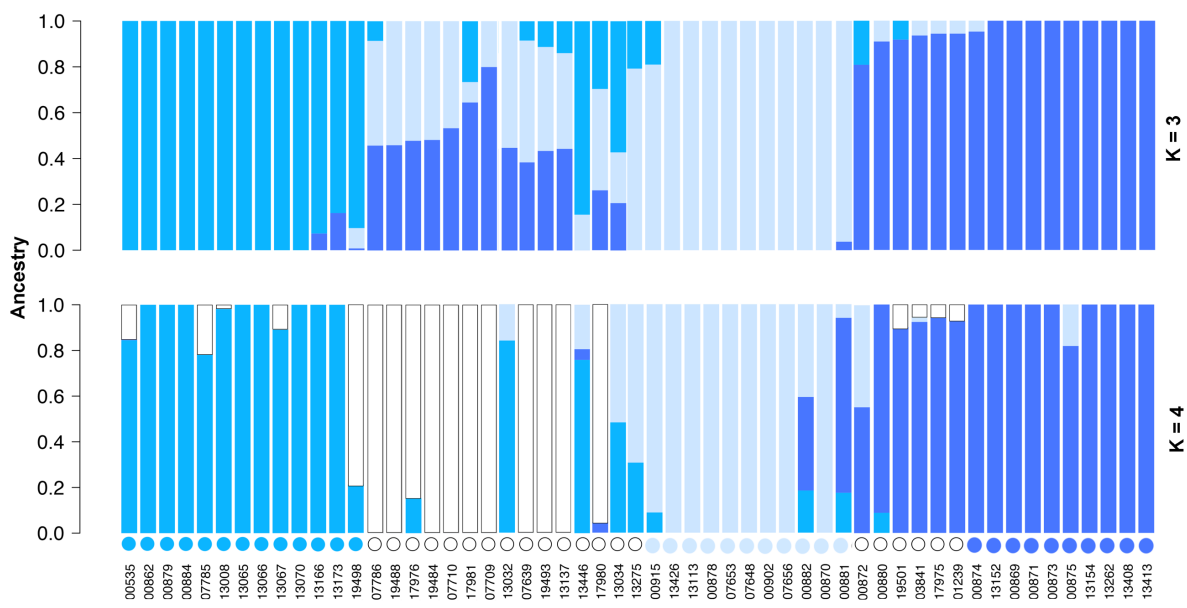

Supplementary Fig. 7: Admixture plots constructed using 175,942 SNPs and assuming  $K=3$  ( $CV=0.1558$ ) and  $K=4$  ( $CV=0.16514$ ). Source data are provided as Source Data file 1.

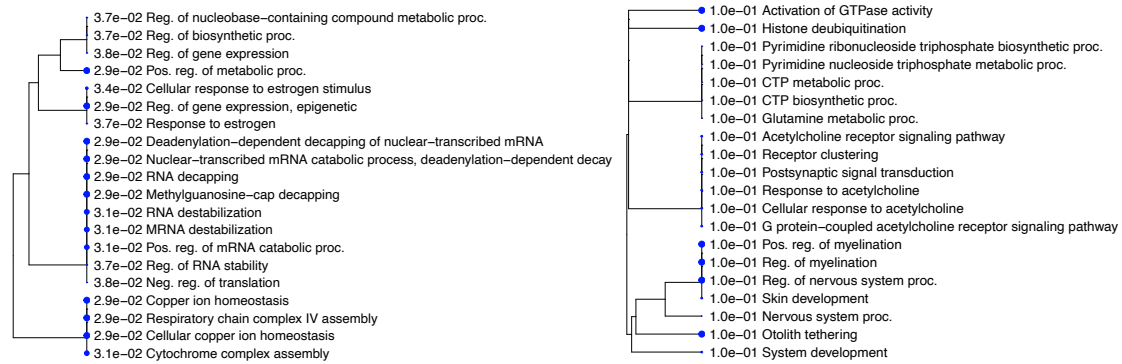

Supplementary Fig. 8: Hierarchical clustering tree of gene ontology (GO) terms fore gene annotations in concordance with Supplementary Table 4 and 7. Pathways with many shared genes are clustered together. Bigger dots indicate more significant p-values in false discovery rate (FDR). Left, results based on private alleles in hybrids, involving different GO functions for biological processes, mainly clustering in four groups: (i) respiratory functions, (ii) different pathways for RNA degradation, (iii) response to estrogen stimulus and gene expression and (iv) related to metabolic processes. Right, results for GO enrichment analysis for fixed SNPs in parental species, including several different biological processes associated to them, including pyrimidine and CTP metabolism, as well nervous system processes.

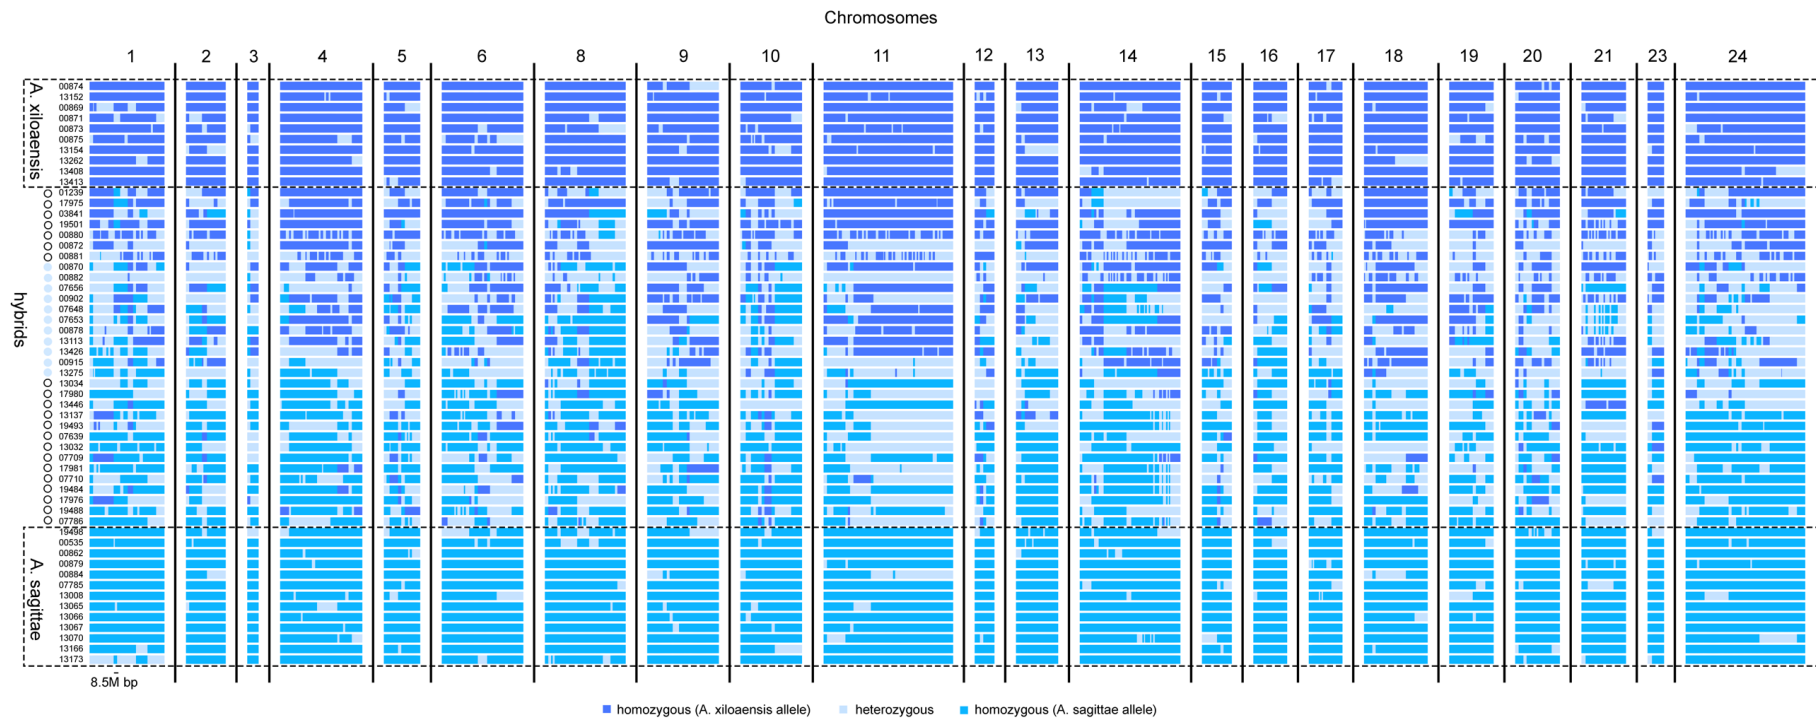

Supplementary Fig. 9: Matrix comparing hybrid genotypes at 615 SNPs under 95% fixation rate frequency between the parental species. Separation of SNP columns is in log-scale according to their physical distance within each chromosome (scale shown in chromosome 1, bottom). Source data is available in Source Data file 1.

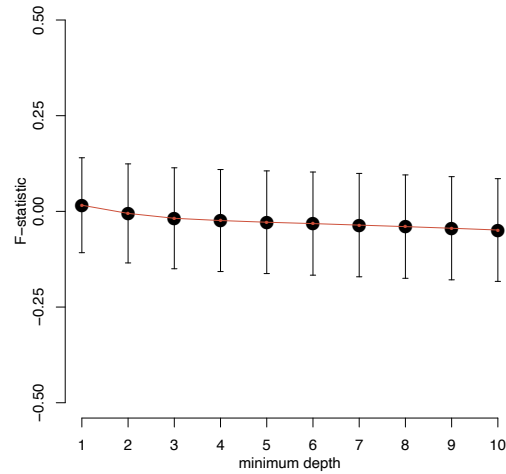

Supplementary Fig. 10: Mean and standard deviation ( $n = 55$  biologically independent individuals) of inbreeding coefficient ( $F\text{-statistic} = 1 - \text{observed heterozygosity} / \text{expected heterozygosity}$ ) calculated based on different minimum depth filters applied to the genomic data (`--minDP 1 to 10` in `vcftools`, no missing data filter applied in order to explore the impact of low coverage affecting calculated heterozygosity). No significant difference are found in any comparisons between  $DP = 2$  to  $10$  (two sided F-test;  $F = 0.6795$  on  $8$  and  $486$  DF,  $p\text{-value} 0.7098$ ). Source data are provided as Source Data file 1.

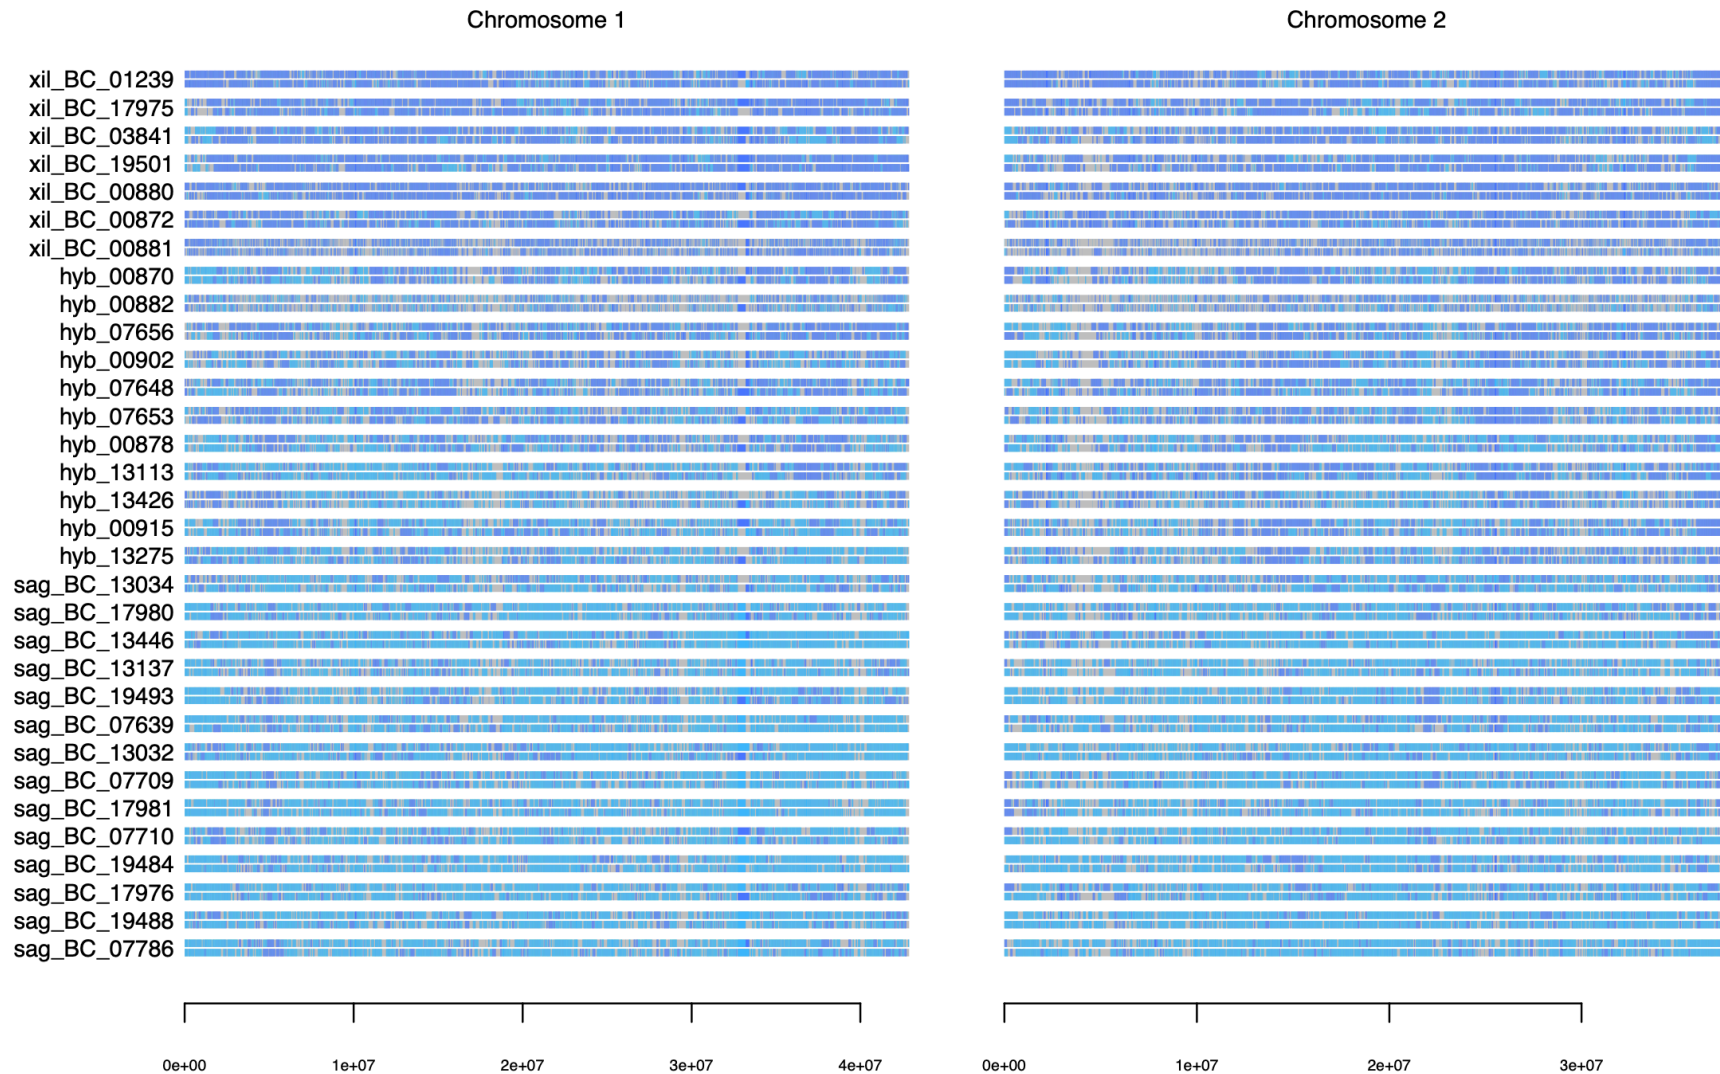

Supplementary Fig. 11: Estimate of ancestry with chromopainter for hybrid individuals + backcrosses across their 24 chromosomes inferred as *A. sagittae* (light blue) or *A. xiloensis* (dark blue) with probability >0.8. Gray represents uncertain ancestry (probability <0.8). Source data are provided in Source Data file 2. This figure continues below.



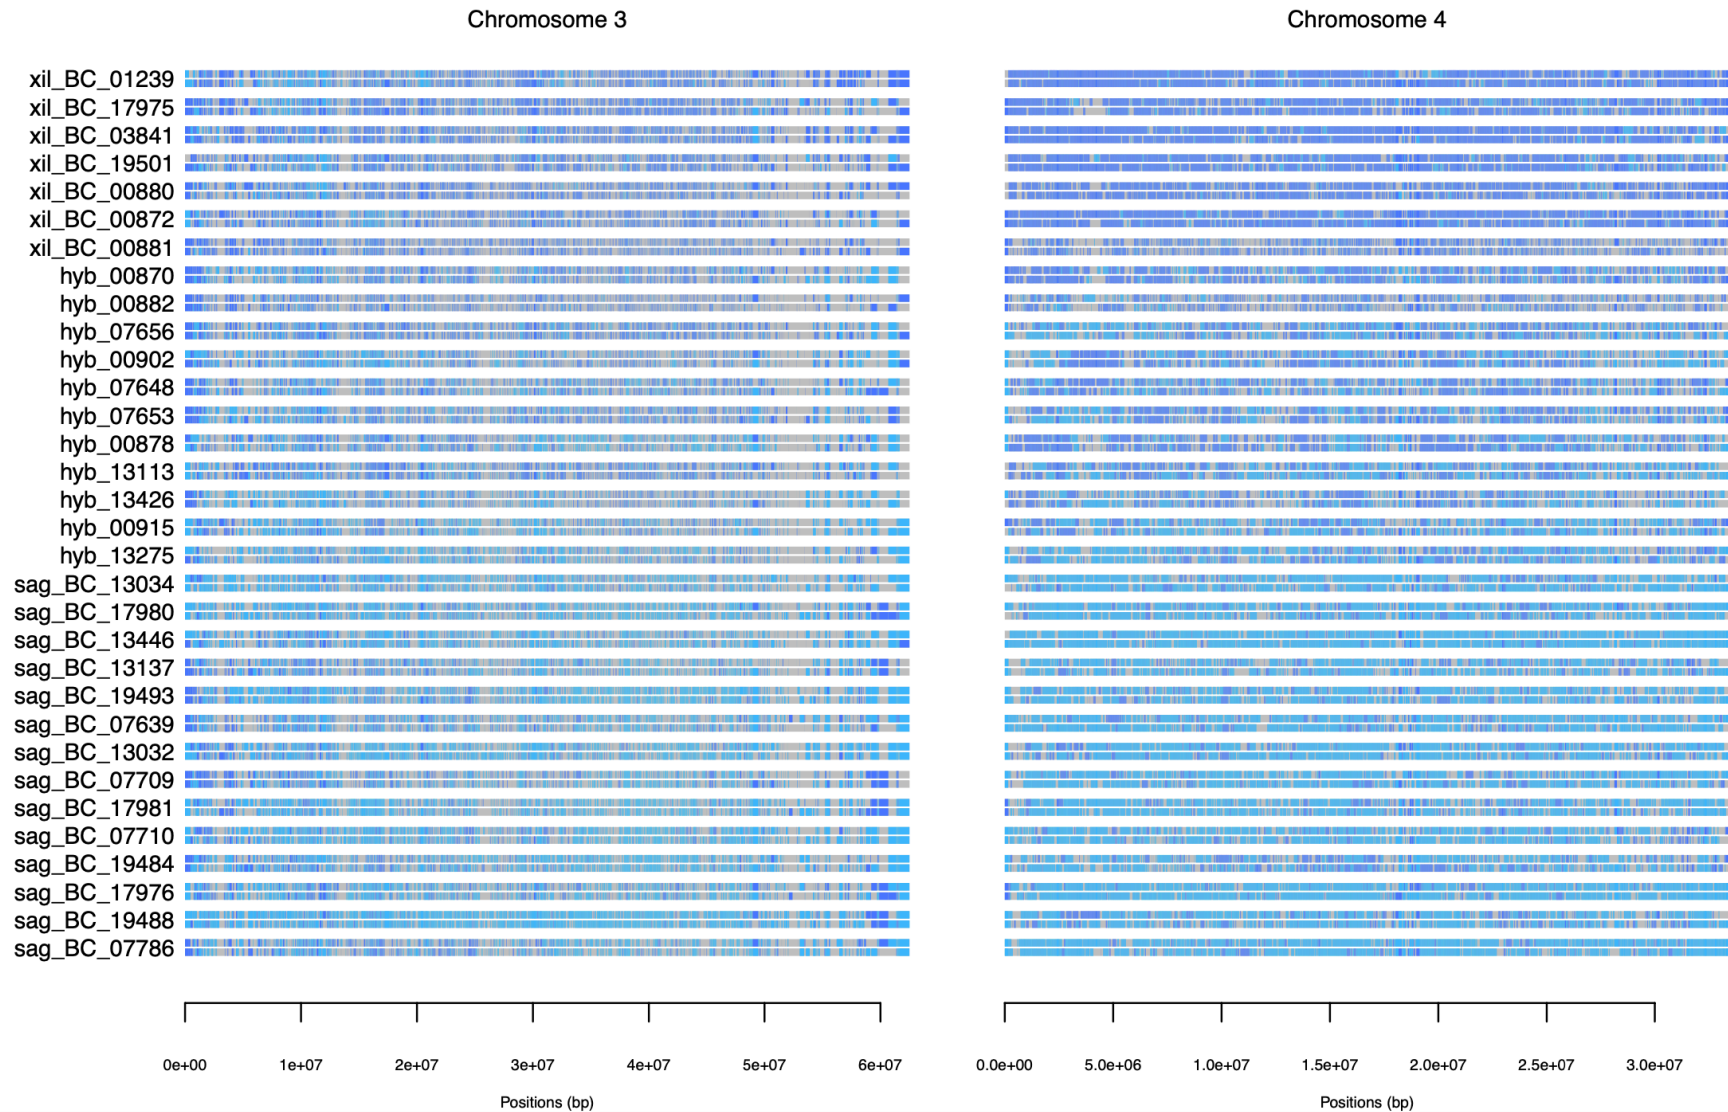

Supplementary Fig. 11 (continuation): Estimate of ancestry with chromopainter for 11 hybrid individuals across their 24 chromosomes inferred as *A. sagittae* (light blue) or *A. xiloaensis* (dark blue) with probability >0.8. Gray represents uncertain ancestry (probability <0.8). Source data are provided in Source Data file 2. This figure continues below.

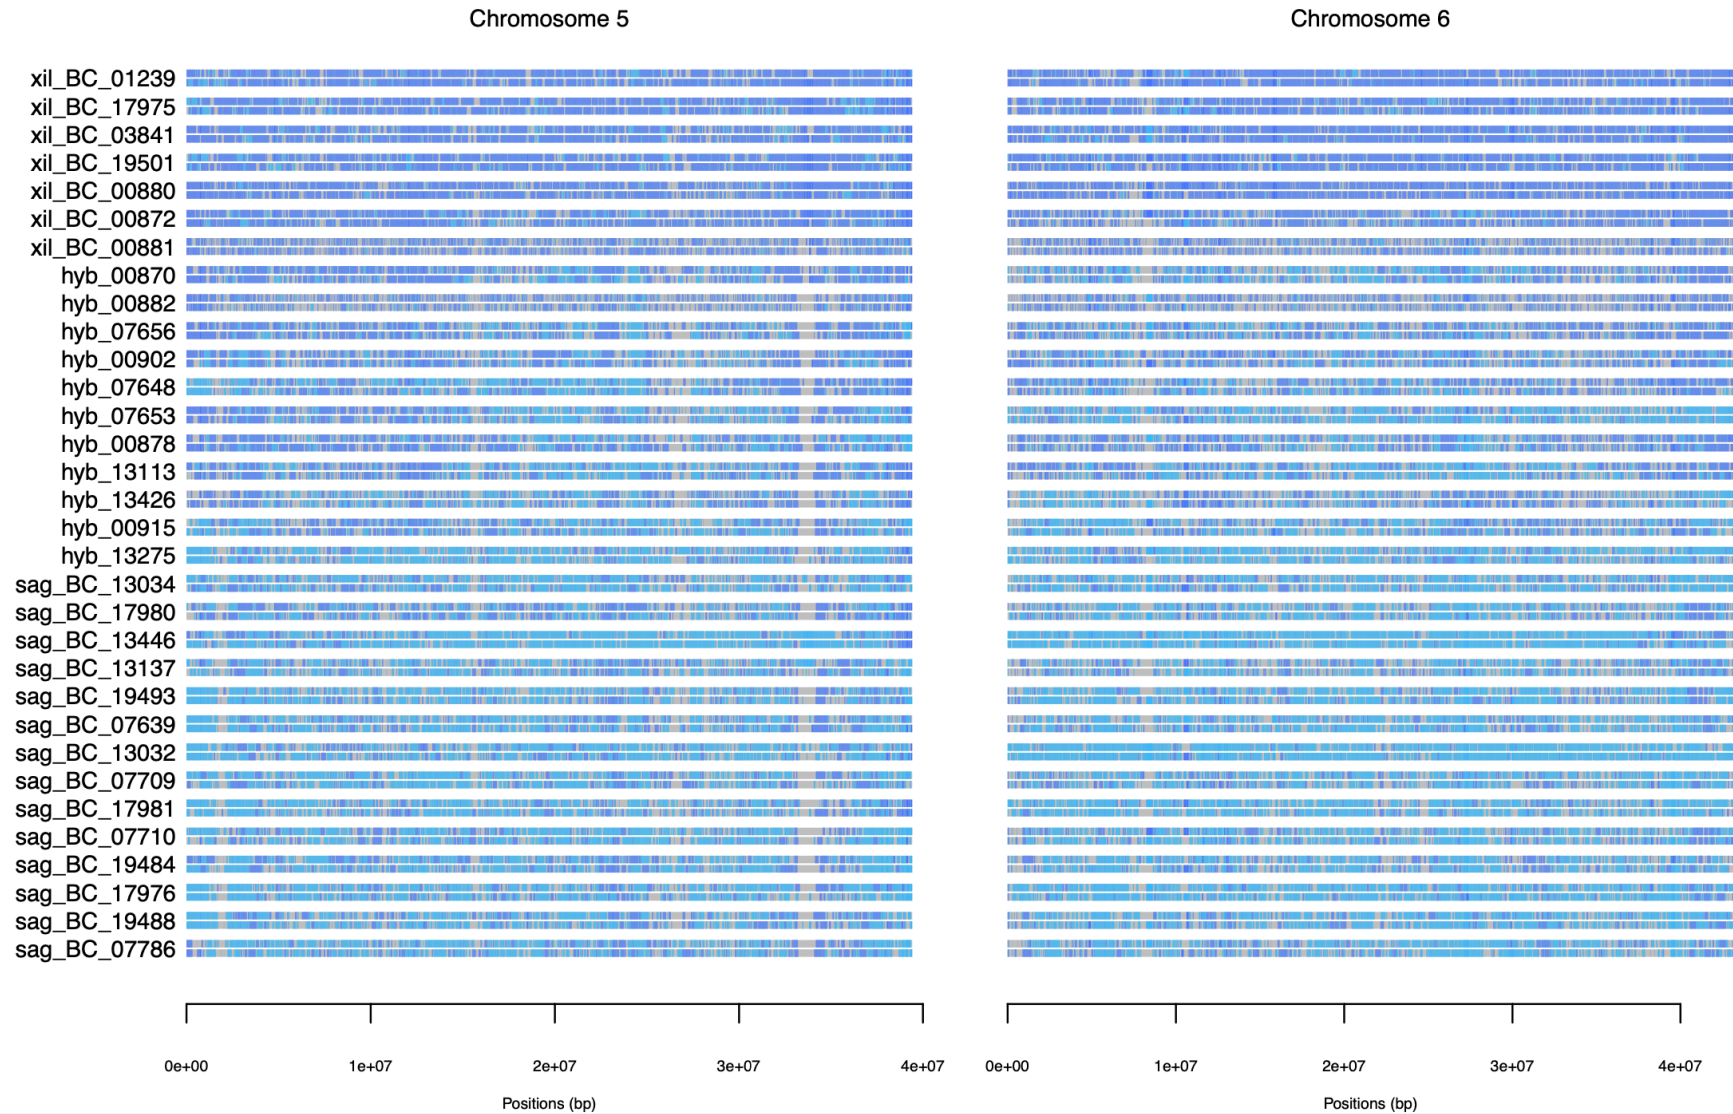

Supplementary Fig. 11 (continuation): Estimate of ancestry with chromopainter for hybrid individuals + backcrosses across their 24 chromosomes inferred as *A. sagittae* (light blue) or *A. xiloaensis* (dark blue) with probability >0.8. Gray represents uncertain ancestry (probability <0.8). Source data are provided in Source Data file 2. This figure continues below.

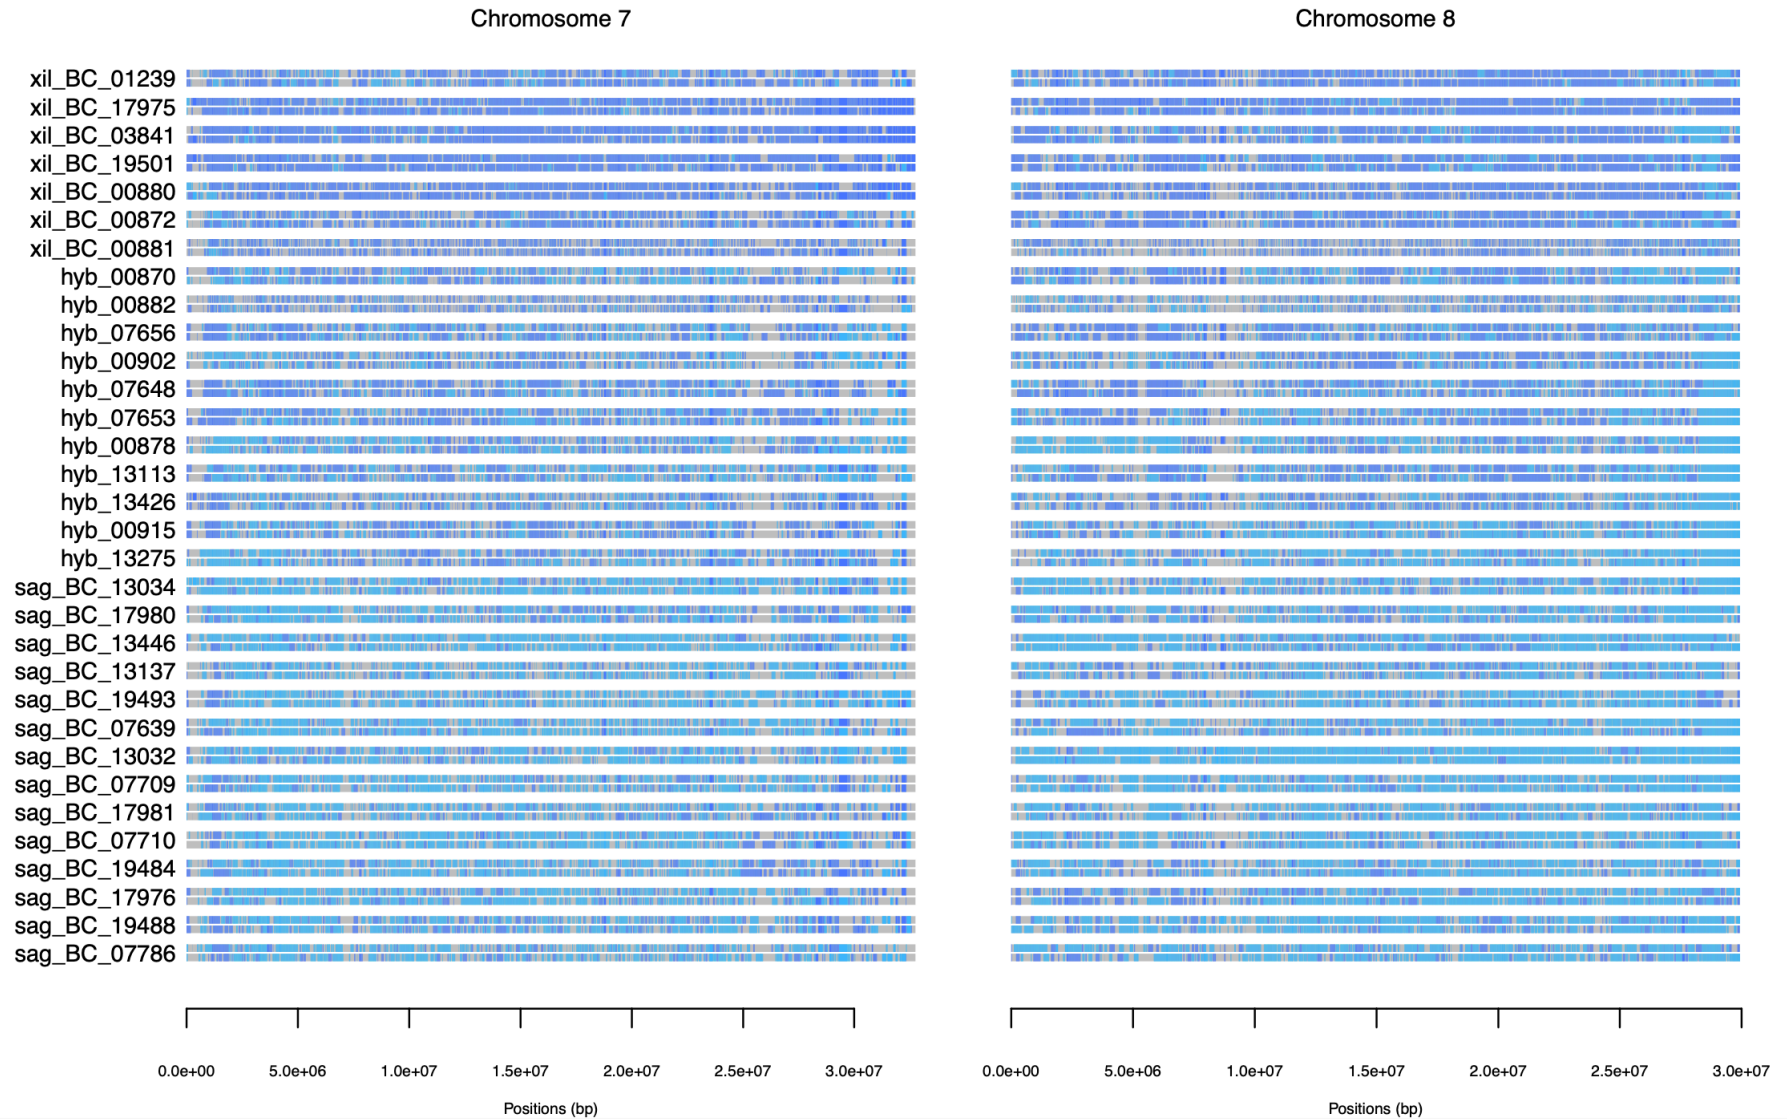

Supplementary Fig. 11 (continuation): Estimate of ancestry with chromopainter for hybrid individuals + backcrosses across their 24 chromosomes inferred as *A. sagittae* (light blue) or *A. xiloaensis* (dark blue) with probability >0.8. Gray represents uncertain ancestry (probability <0.8). Source data are provided in Source Data file 2. This figure continues below.

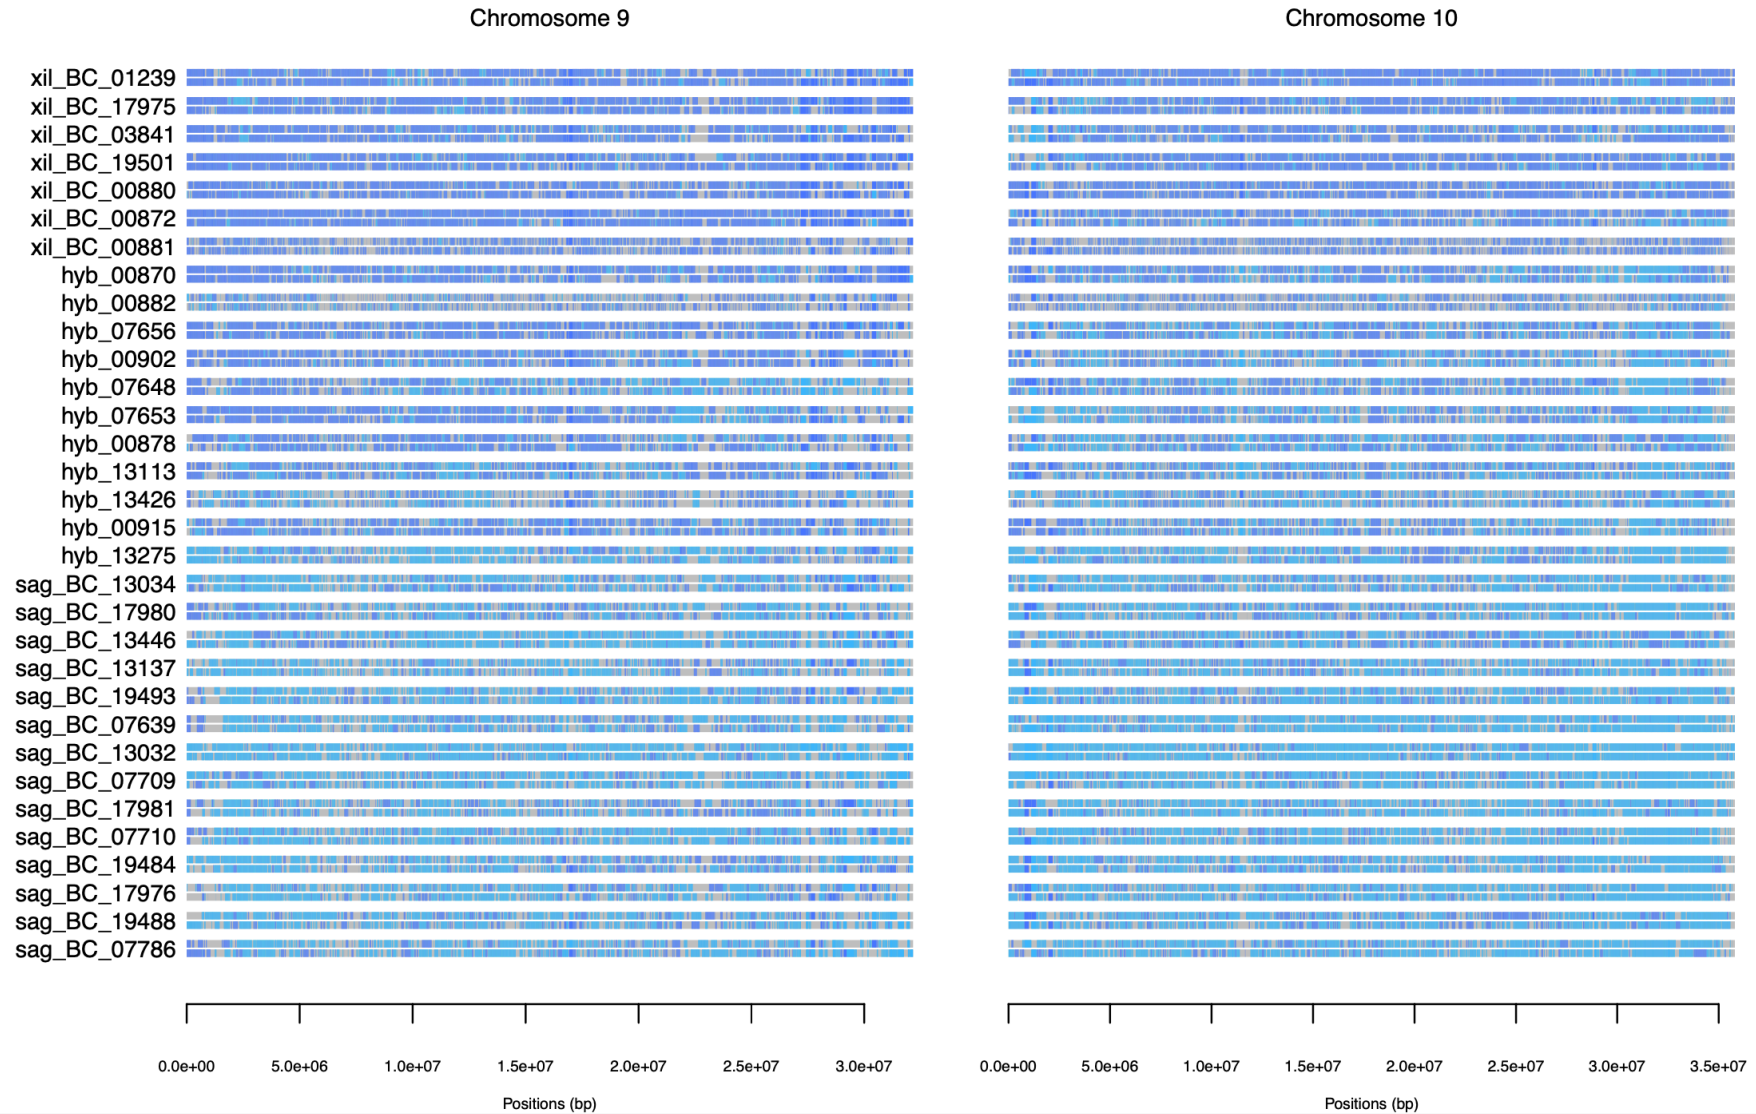

Supplementary Fig. 11 (continuation): Estimate of ancestry with chromopainter for hybrid individuals + backcrosses across their 24 chromosomes inferred as *A. sagittae* (light blue) or *A. xiloaensis* (dark blue) with probability >0.8. Gray represents uncertain ancestry (probability <0.8). Source data are provided in Source Data file 2. This figure continues below.

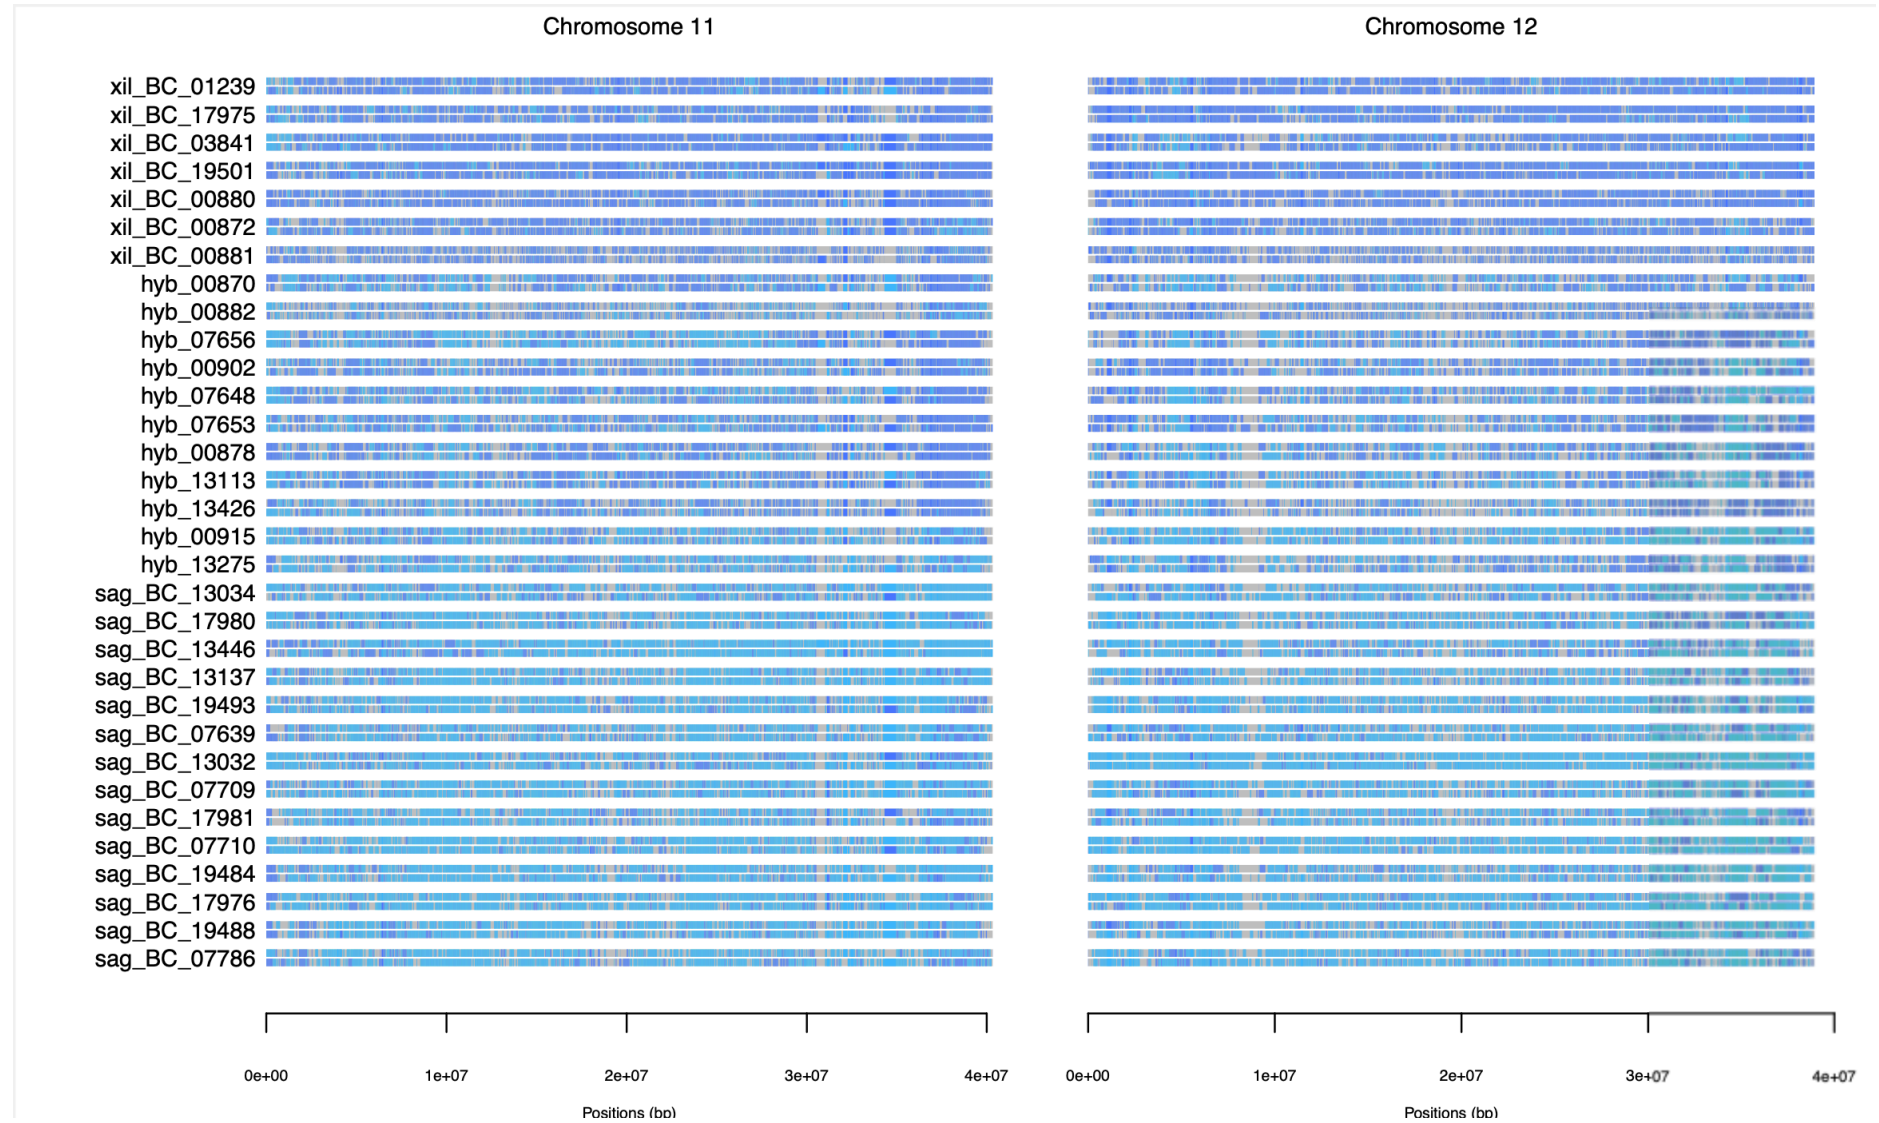

Supplementary Fig. 11 (continuation): Estimate of ancestry with chromopainter for hybrid individuals + backcrosses across their 24 chromosomes inferred as *A. sagittae* (light blue) or *A. xiloaensis* (dark blue) with probability >0.8. Gray represent uncertain ancestry (probability <0.8). Source data are provided in Source Data file 2. This figure continues below.

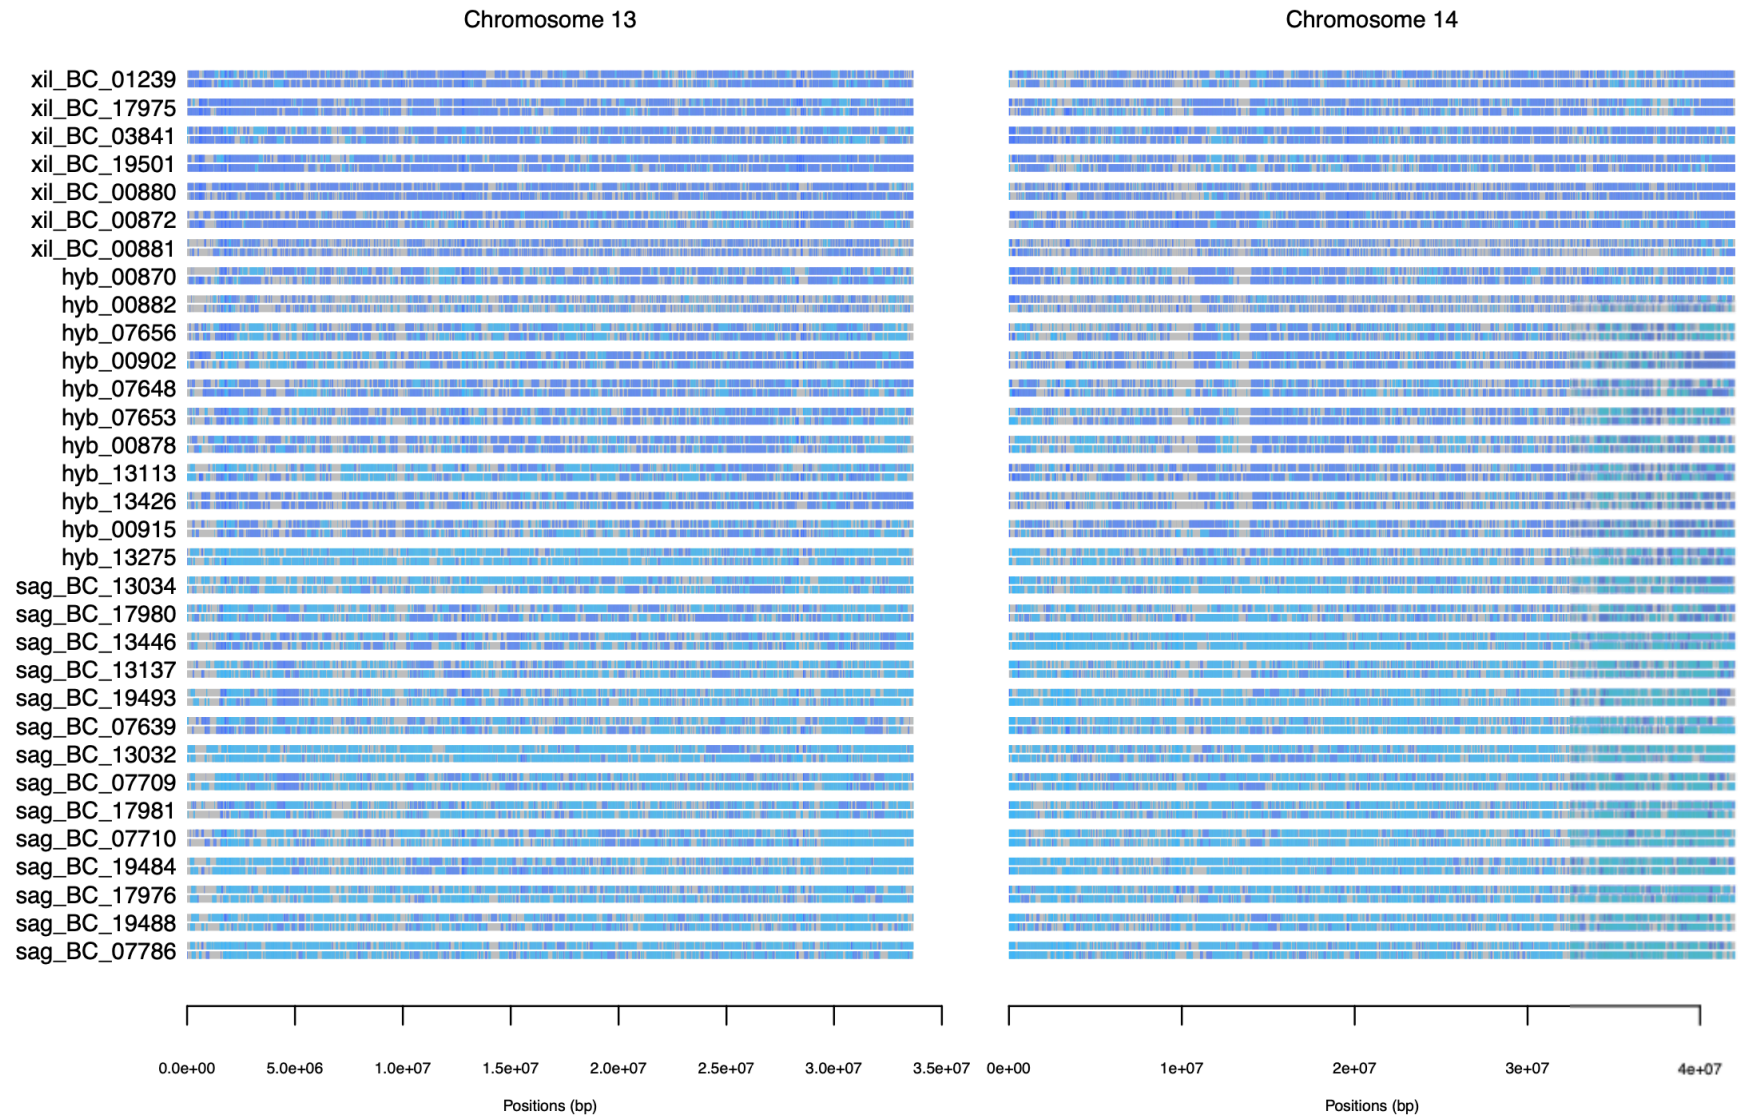

Supplementary Fig. 11 (continuation): Estimate of ancestry with chromopainter for hybrid individuals + backcrosses across their 24 chromosomes inferred as *A. sagittae* (light blue) or *A. xiloaensis* (dark blue) with probability >0.8. Gray represents uncertain ancestry (probability <0.8). Source data are provided in Source Data file 2. This figure continues below.

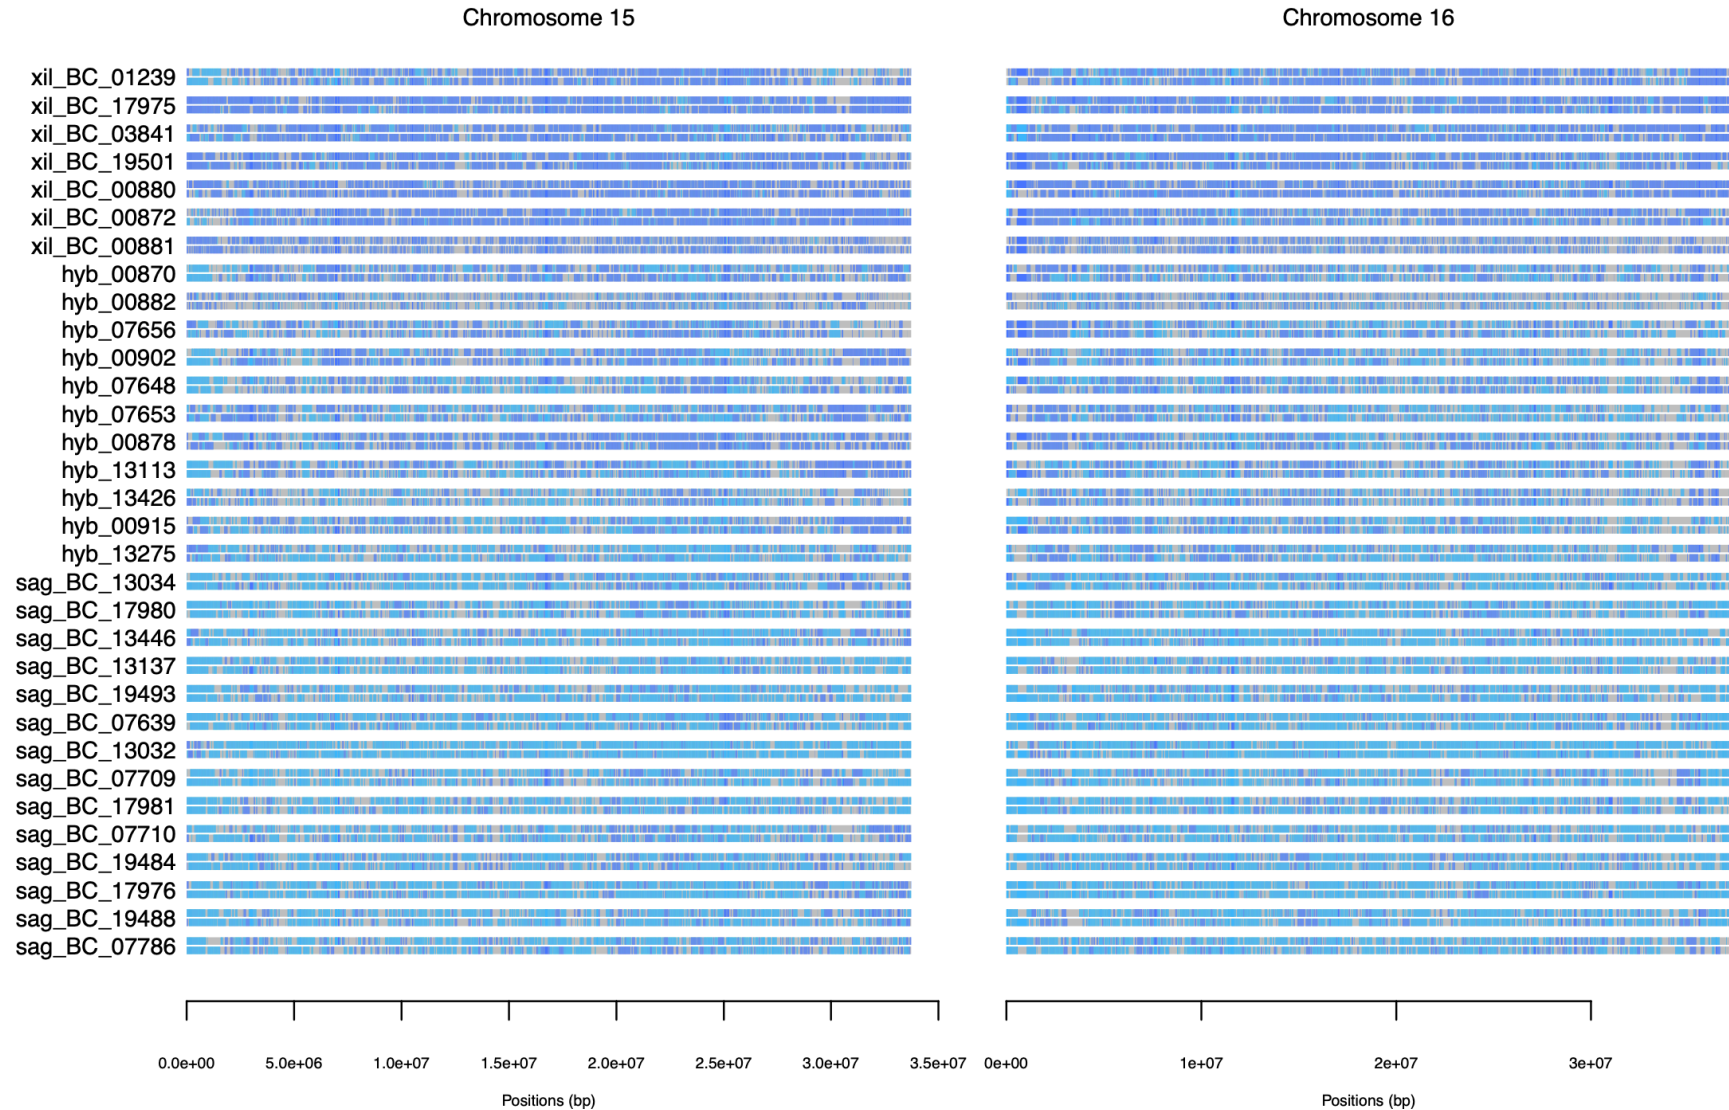

Supplementary Fig. 11 (continuation): Estimate of ancestry with chromopainter for hybrid individuals + backcrosses across their 24 chromosomes inferred as *A. sagittae* (light blue) or *A. xiloaensis* (dark blue) with probability >0.8. Gray represents uncertain ancestry (probability <0.8). Source data are provided in Source Data file 2. This figure continues below.

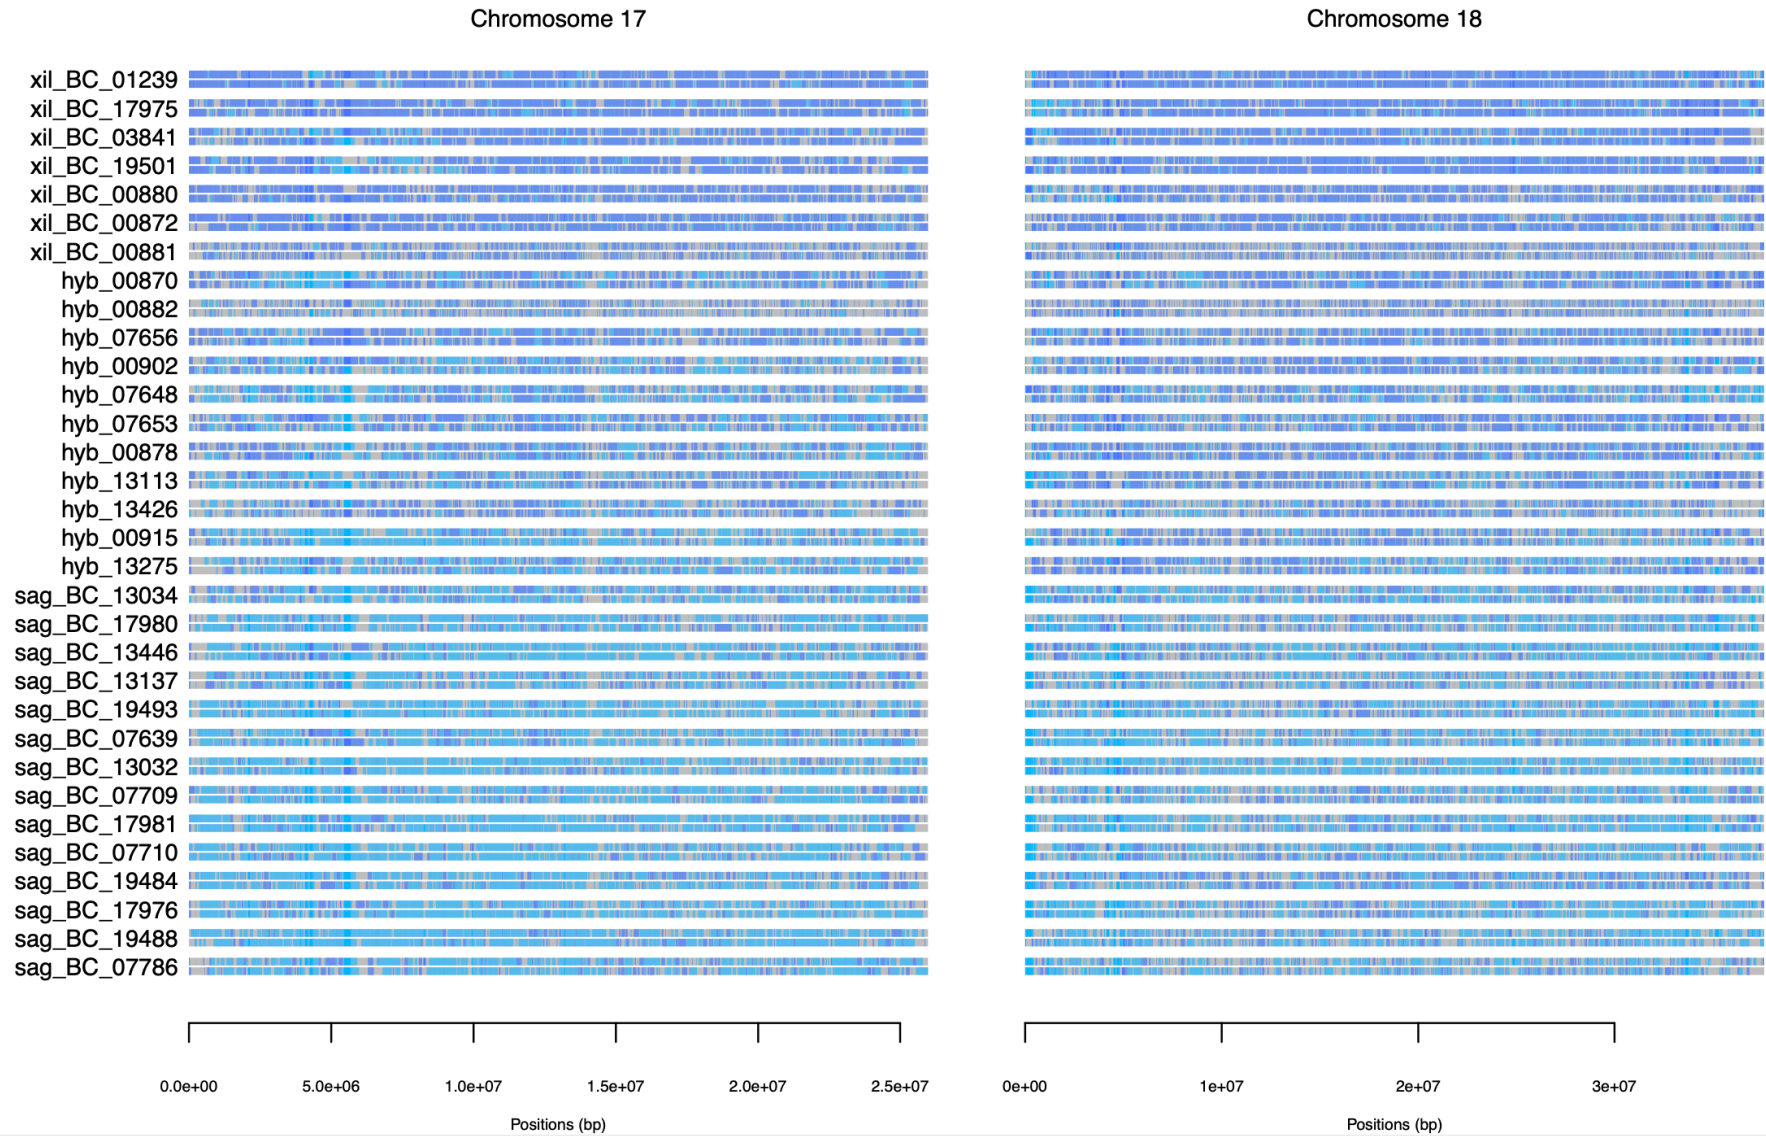

Supplementary Fig. 11 (continuation): Estimate of ancestry with chromopainter for hybrid individuals + backcrosses across their 24 chromosomes inferred as *A. sagittae* (light blue) or *A. xiloaensis* (dark blue) with probability >0.8. Gray represents uncertain ancestry (probability <0.8). Source data are provided in Source Data file 2. This figure continues below.



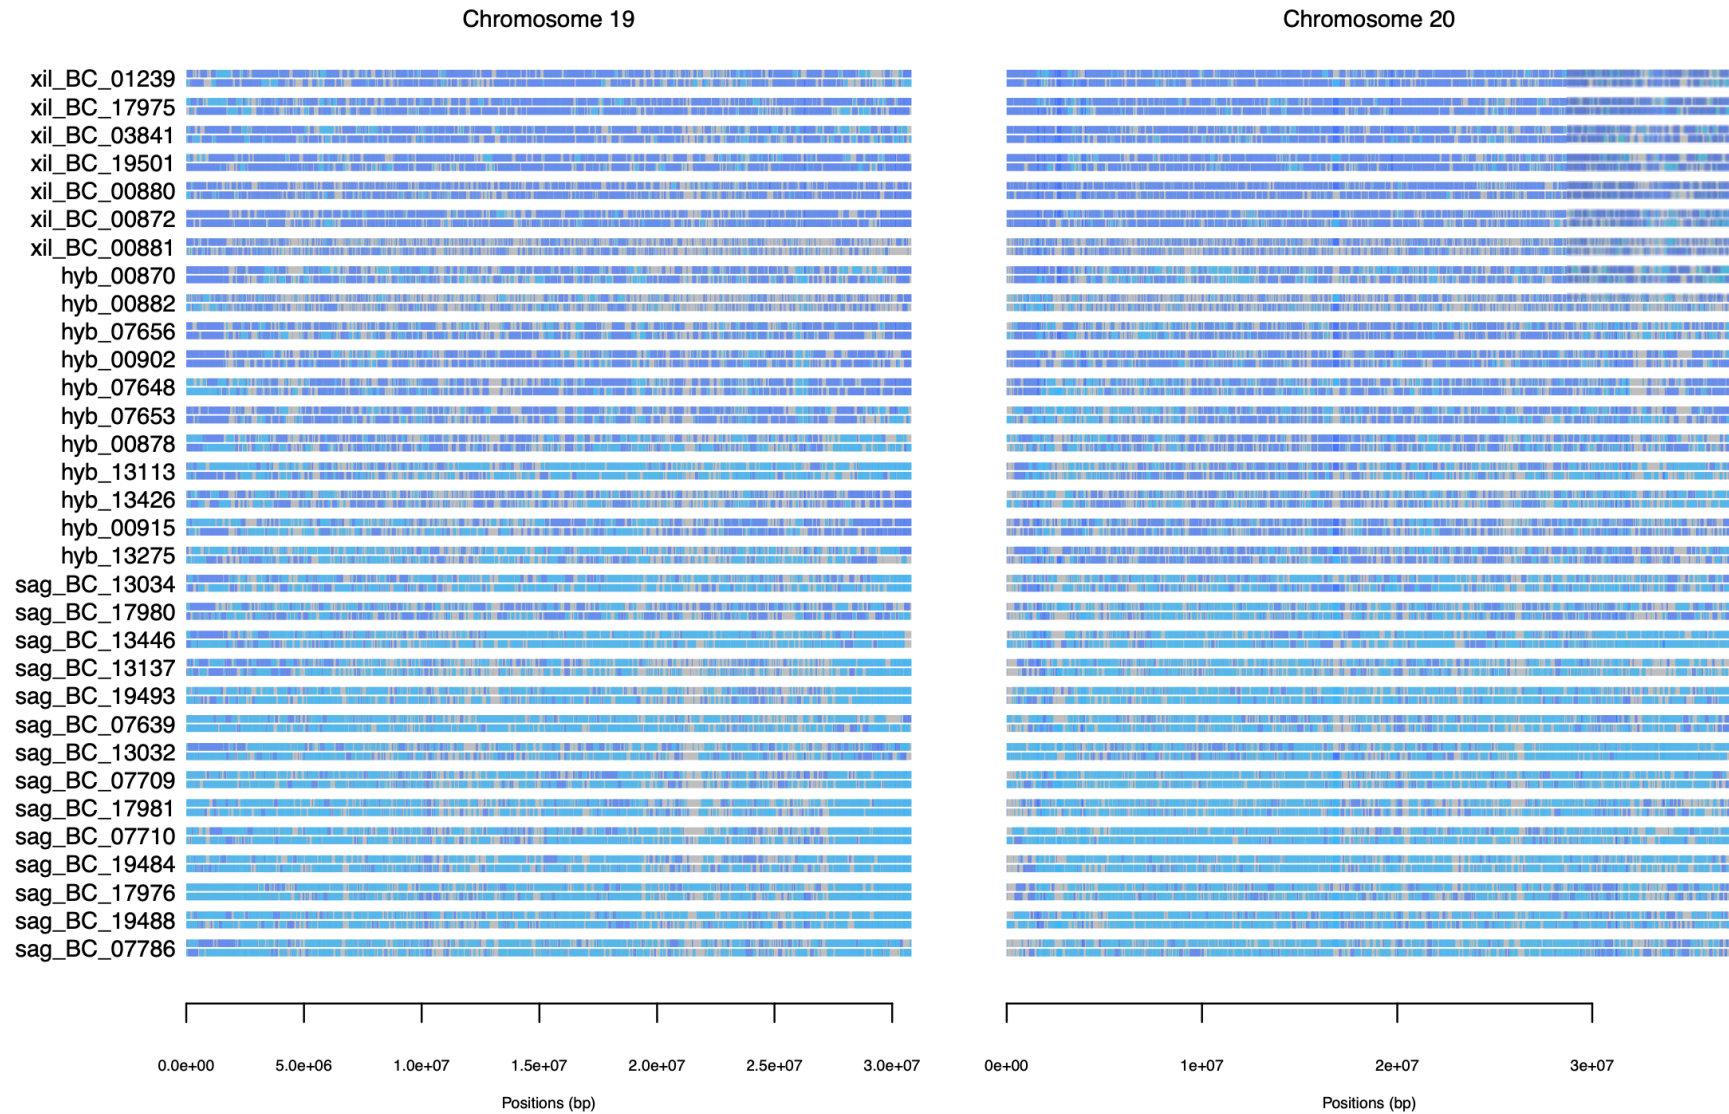

Supplementary Fig. 11 (continuation): Estimate of ancestry with chromopainter for hybrid individuals + backcrosses across their 24 chromosomes inferred as *A. sagittae* (light blue) or *A. xiloaensis* (dark blue) with probability >0.8. Gray represents uncertain ancestry (probability <0.8). Source data are provided in Source Data file 2. This figure continues below.

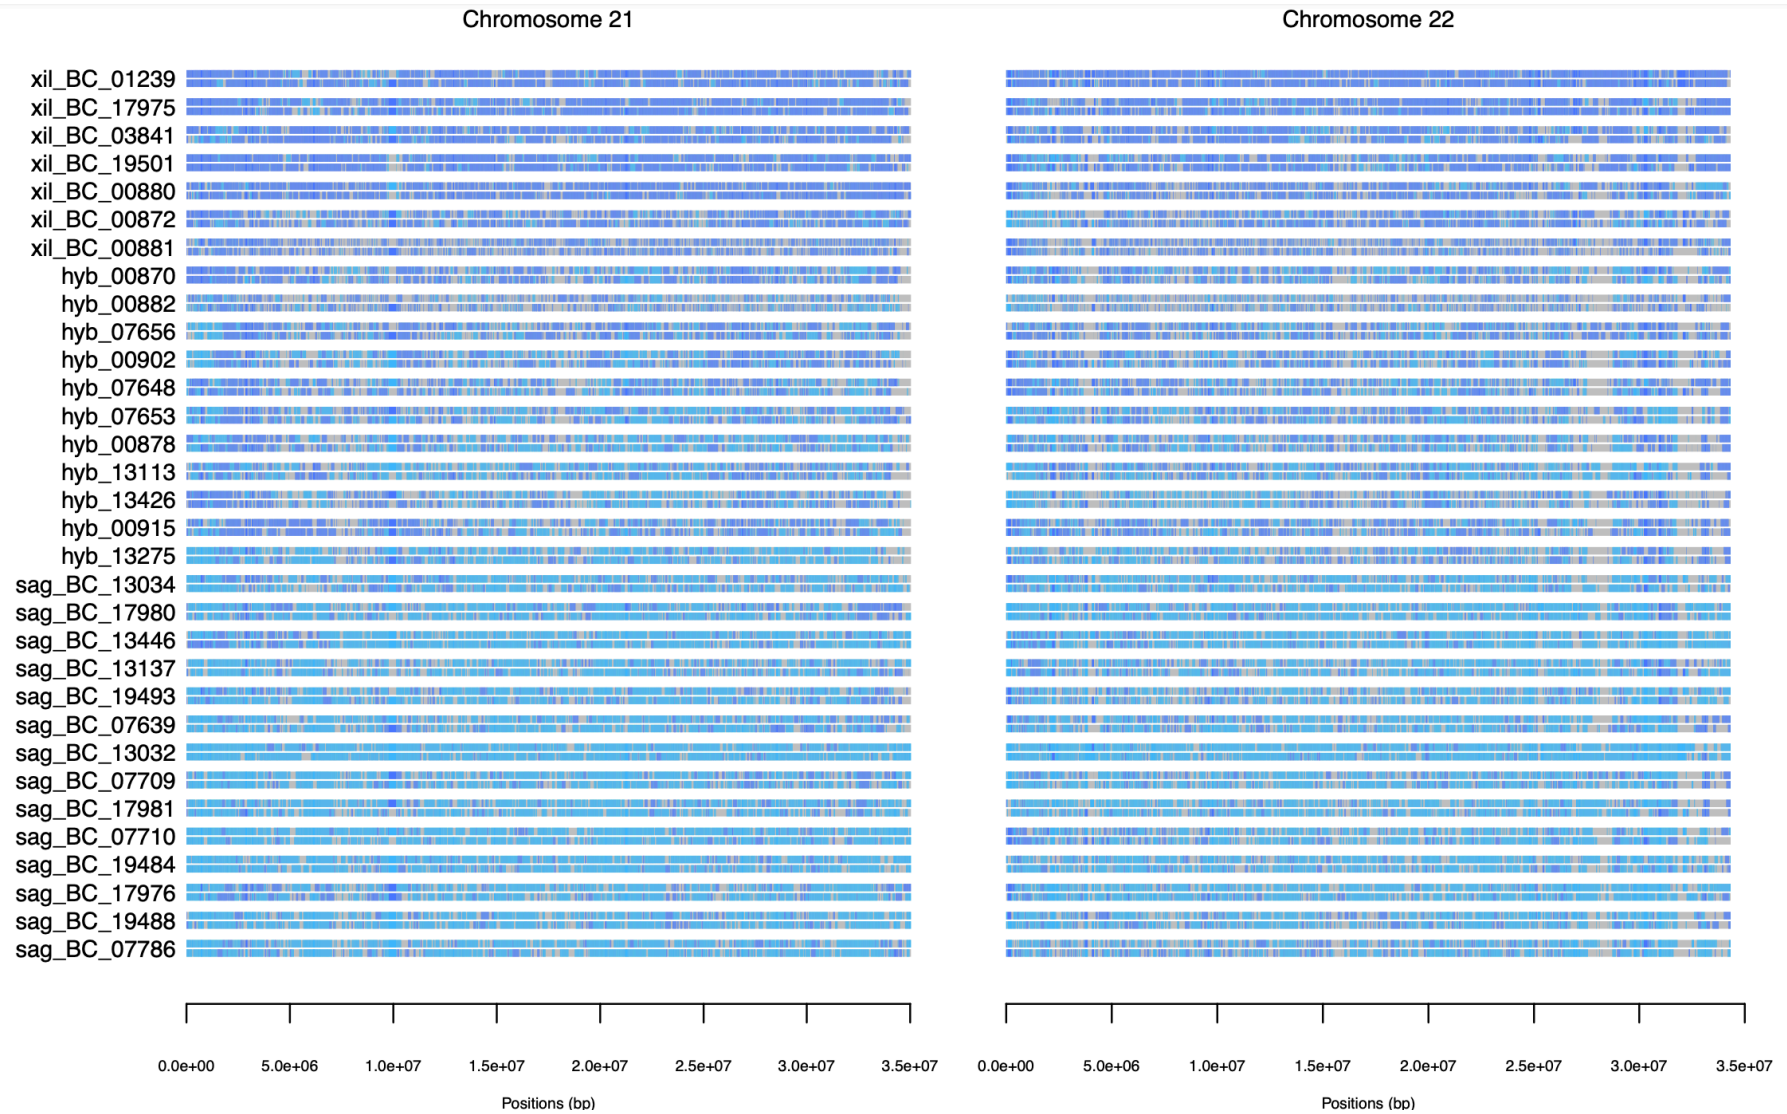

Supplementary Fig. 11 (continuation): Estimate of ancestry with chromopainter for hybrid individuals + backcrosses across their 24 chromosomes inferred as *A. sagittae* (light blue) or *A. xiloaensis* (dark blue) with probability >0.8. Gray represents uncertain ancestry (probability <0.8). Source data are provided in Source Data file 2. This figure continues below.

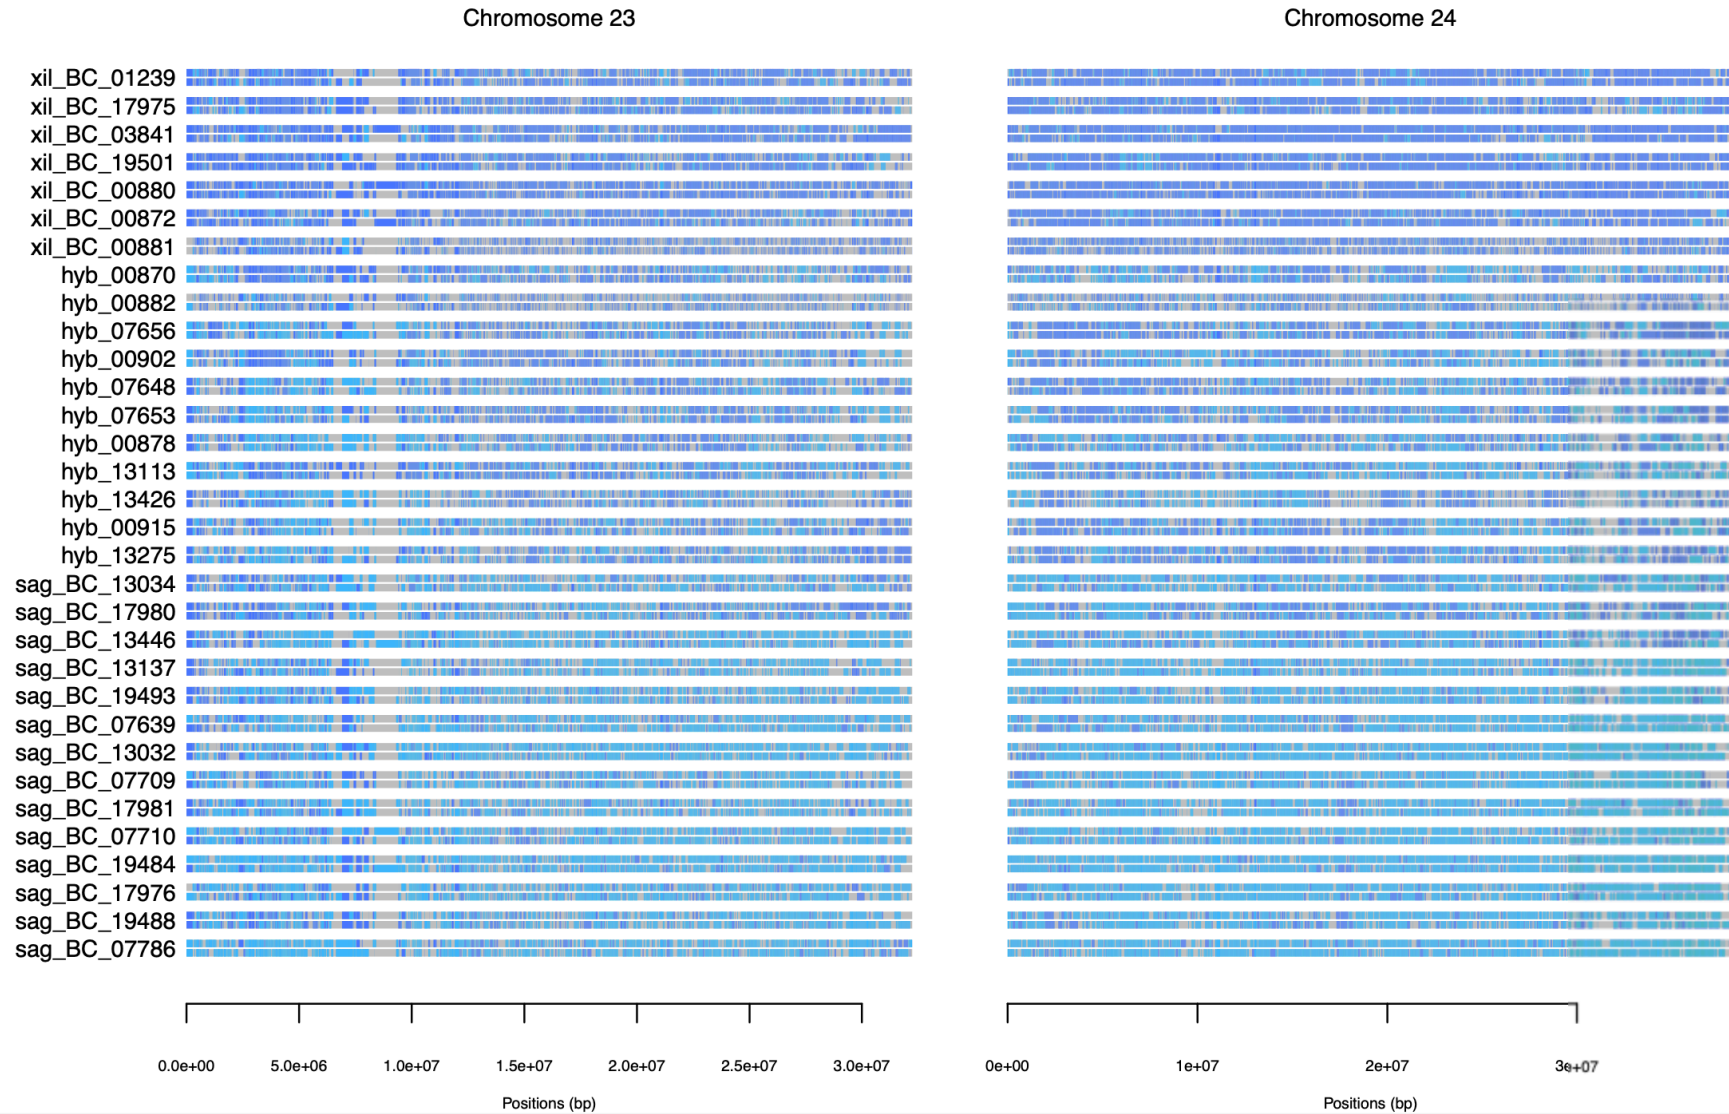

Supplementary Fig. 11 (continuation): Estimate of ancestry with chromopainter for hybrid individuals + backcrosses across their 24 chromosomes inferred as *A. sagittae* (light blue) or *A. xiloaensis* (dark blue) with probability >0.8. Gray represents uncertain ancestry (probability <0.8). Source data are provided in Source Data file 2.

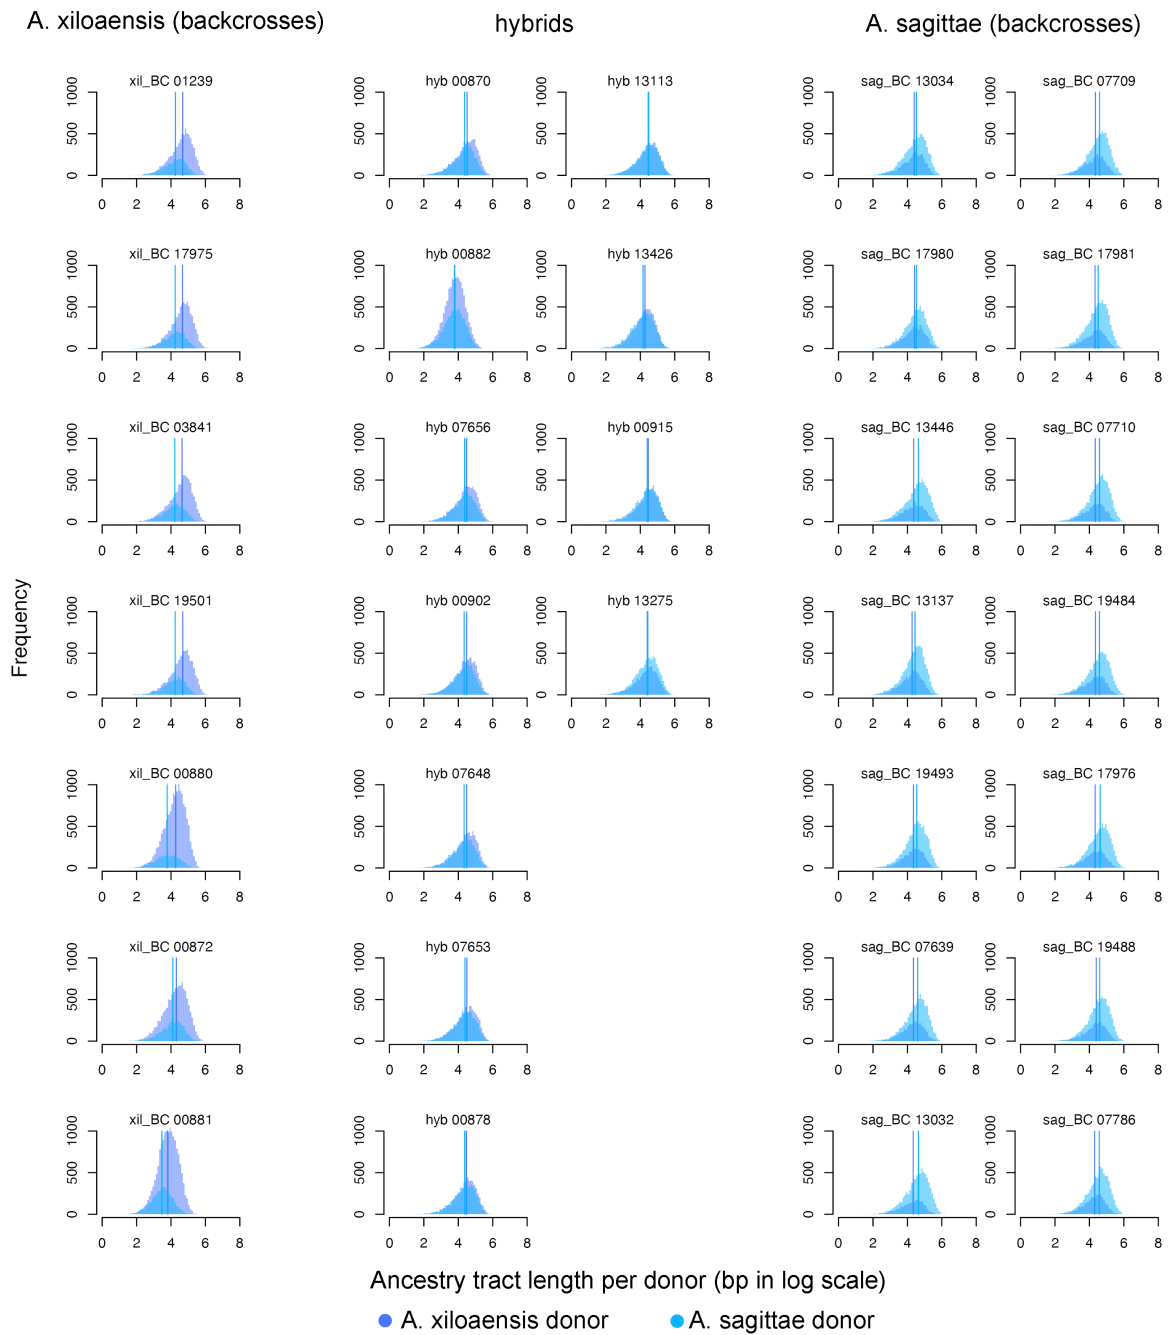

Supplementary Fig. 12: Histograms of ancestry tract length (bp) per individual and separated per donor (in log scale). Vertical lines indicate positions of medians. Source data is provided in Source Data file 2.

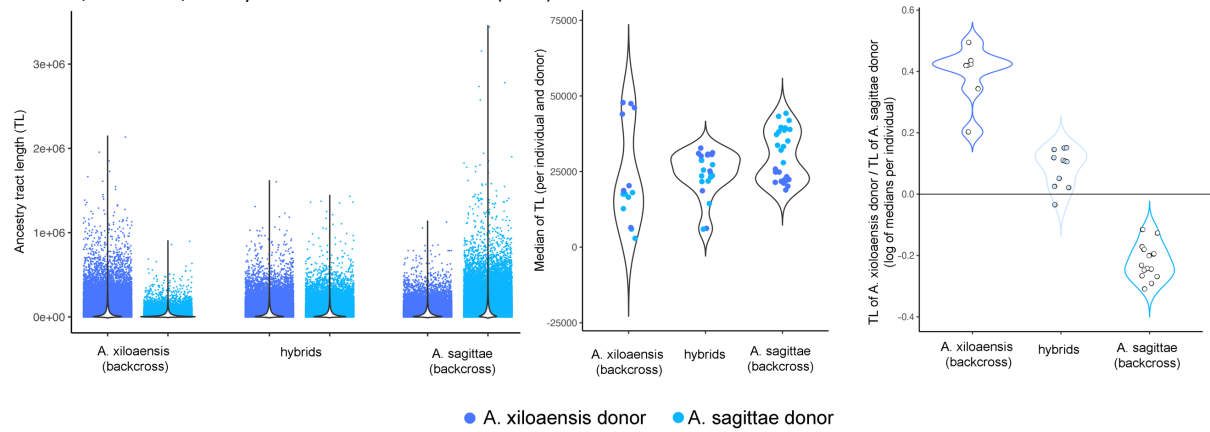

Supplementary Fig. 13: Violin plots showing: left, ancestry tract length (TL) for backcrosses and hybrids and their donors; center, medians of donor TL obtained per individual for backcrosses and hybrids; right, donor ratio of TL medians for backcrosses and hybrids. In the later, horizontal line is indicating log ratio = 0, i.e. equal medians for both donors. Source data are provided as Source Data file 1 and 2.

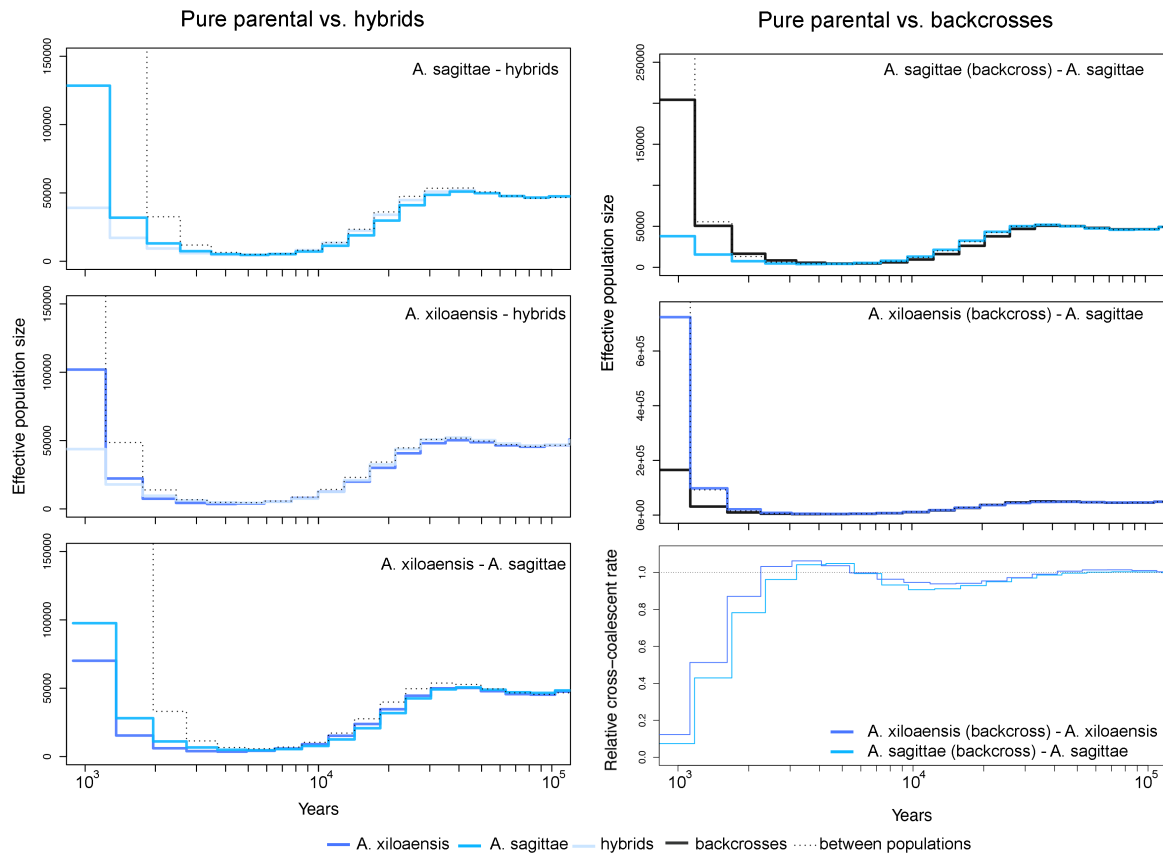

Supplementary Fig. 14: Left, changes in effective population size through time estimated using MSMC comparing hybrids and pure parental species. Right, changes in effective population size through time and relative cross coalescence rates estimated using MSMC comparing backcrosses and pure parental species. Source data are provided as Source Data file 1.

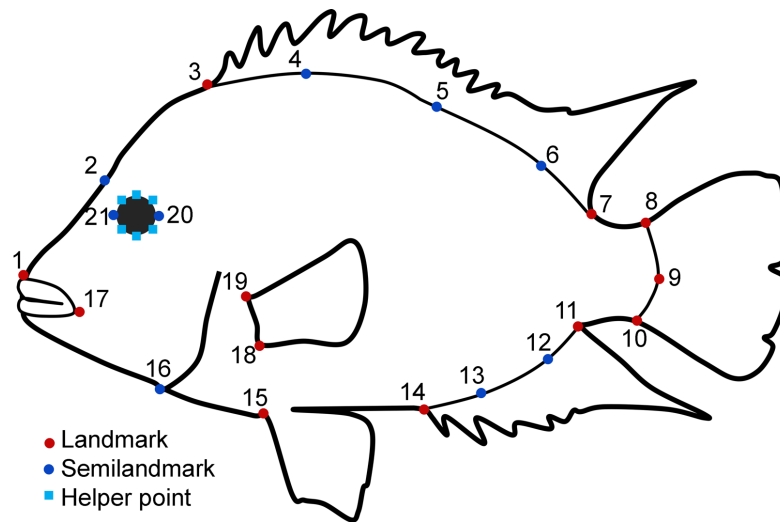

Supplementary Fig. 15: Landmark, semilandmark and helper point positions for geometric morphometric analyses. Raw Source Data is available in tps format in Source Data file 2.

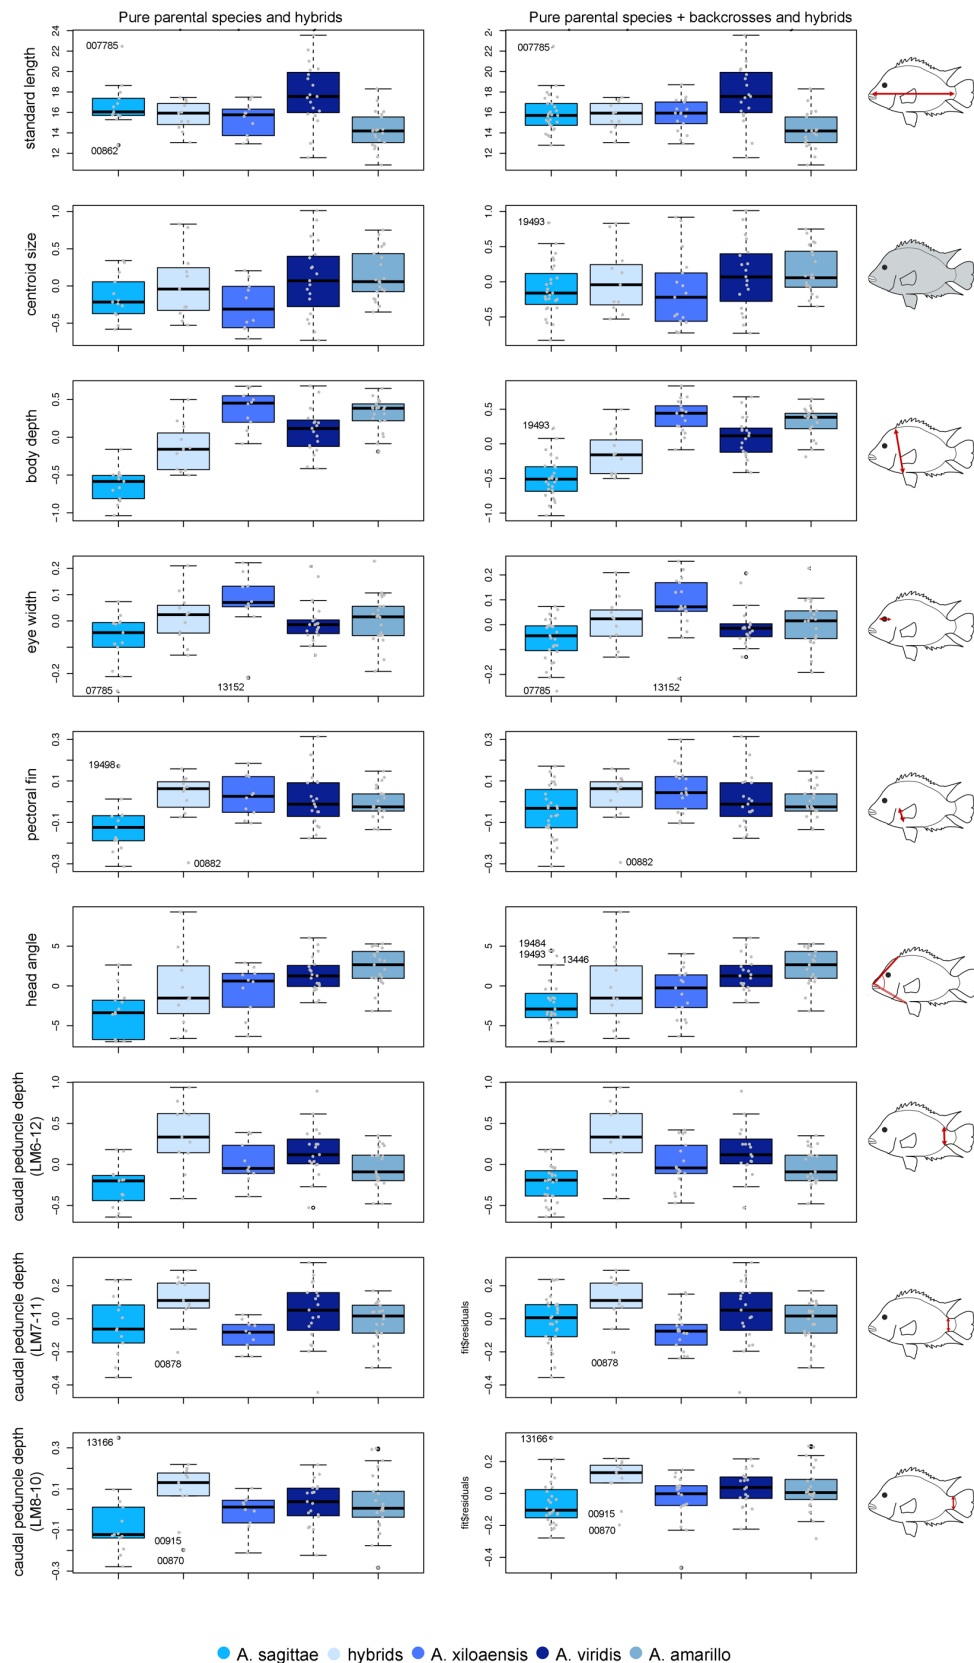

Supplementary Fig. 16: Box plots of different linear measures of all Midas cichlid species in CL Xiloá, displaying 5% and 95% quartile (lower and upper whiskers limits, respectively), 25% and 75% quartile (lower and upper box bounds, respectively) and 50% quantil in centre. For comparison, only pure parental and hybrid samples were included in the plots on the left, and backcrosses were classified as parental species in plots on the right. From the second row to the bottom, residuals were obtained after regressing variables with standard length (i.e., size correction). A total of biological independent *A. xiloaensis* n=10, *A. sagittae* n = 13, hybrids n = 11, backcrosses n = 21, *A. viridis* n = 19, *A. amarillo* n=21 IDs of outliers for the two parental species and hybrids are shown. Source data are provided as Source Data file 1.

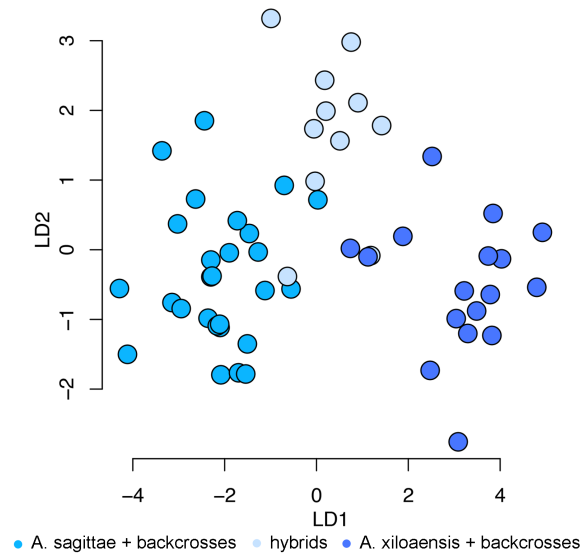

Supplementary Fig. 17: Scatter plot of LD1 and LD2 axes obtained from a linear discriminant function based on the geometric morphometric data and including all ingroup samples (pure parental species plus backcrosses and hybrids). Source data are provided as Source Data file 1.

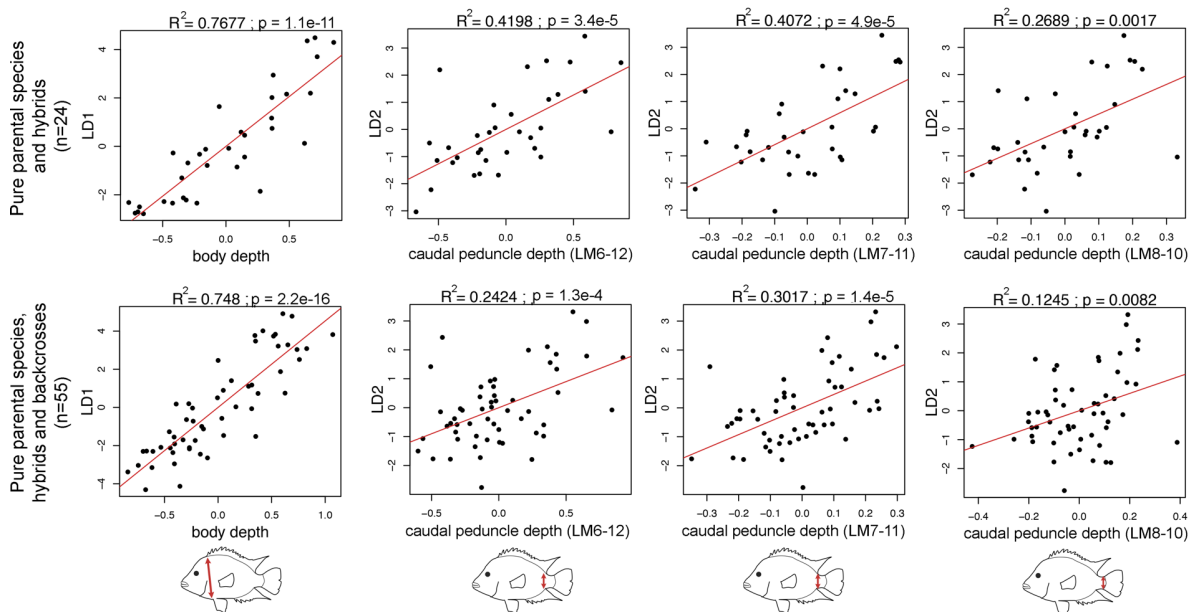

Supplementary Fig. 18: Linear correlations and two sided F-test result between LD1 (from discriminant analysis, Supplementary Fig. 6) and body depth (left), as well as LD2 and caudal peduncle depth (using different LMs), considering only pure *A. sagittae*, *A. xiloaensis*, and hybrids (above) and all samples including backcrosses (below). All linear variables described in the materials and methods section were fitted (shown in Supplementary Fig. 15), but only significant correlations are shown here. Source data are provided as Source Data file 1.



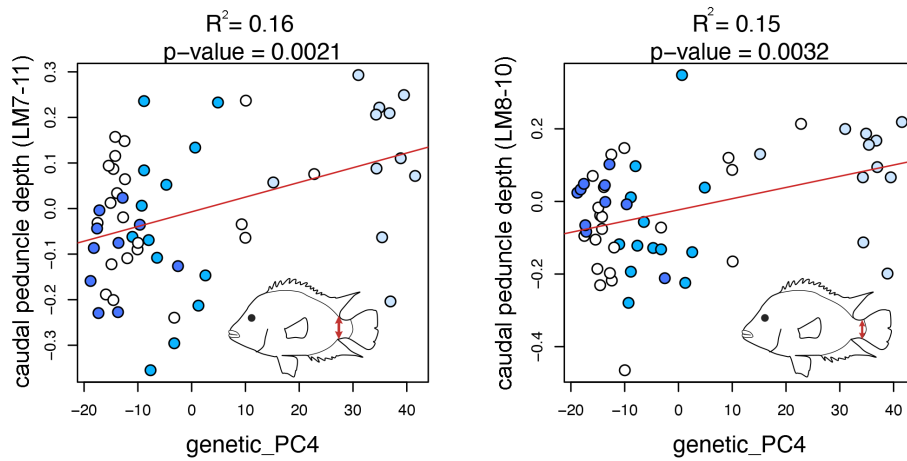

Supplementary Fig. 19: Scatter plots and linear models fit between the caudal peduncle depth (using linear distances between different LM sets (LM7-11 and 8-10); after correcting by standard length) and the genetic PC4. Statistical two sided F-test results: (left)  $F = 10.46$  on 1 and 53 DF,  $p\text{-value} = 0.002105^{**}$ ; (right)  $F = 9.55$  on 1 and 53 DF,  $p\text{-value} = 0.003184^{**}$ . Source data are provided as Source Data file 1.

Supplementary information of the article “Early stages of sympatric homoploid hybrid speciation in crater lake cichlid fishes” by M. Olave, A. Nater, A. F. Kautt, A. Meyer. *Nature Communications* (2022).

Supplementary Table 1. HyDe result (hybrid detection test, Z-test) based on 88,369 SNPs (sampled every 10 kb along the genome). Samples of *A. citrinellus* from Great Lake Managua were used as outgroup. Source data is available in Source Data file 2.

| P1                          | Hybrid         | P2                        | p-value          | Z score       | Gamma        |
|-----------------------------|----------------|---------------------------|------------------|---------------|--------------|
| <b><i>A. xiloaensis</i></b> | <b>hybrids</b> | <b><i>A. sagittae</i></b> | <b>0.00560**</b> | <b>2.5362</b> | <b>0.628</b> |
| <i>A. xiloaensis</i>        | hybrids        | <i>A. viridis</i>         | 0.42332          | 0.3360305     | 0.966        |
| <i>A. xiloaensis</i>        | hybrids        | <i>A. amarillo</i>        | -0.58179         | 0.71964605    | 1.054        |
| <i>A. sagittae</i>          | hybrids        | <i>A. viridis</i>         | -1.42025         | 0.9222339     | 1.244        |
| <i>A. sagittae</i>          | hybrids        | <i>A. amarillo</i>        | -0.22096         | 0.58744054    | 1.022        |
| <i>A. viridis</i>           | hybrids        | <i>A. amarillo</i>        | 1.41714          | 0.07821995    | 0.603        |

Supplementary information of the article “Early stages of sympatric homoploid hybrid speciation in crater lake cichlid fishes” by M. Olave, A. Nater, A. F. Kautt, A. Meyer. *Nature Communications* (2022).

Supplementary Table 2: Private SNP counts per species (frequency cutoff = 0.5). A total of 3,745,928 SNPs were considered among 74 individuals in total: 21 *A. amarillo*, 11 hybrids, 19 *A. viridis*, 10 pure *A. xiloaensis* and 13 pure *A. sagittae*. Source data is provided in vcf format in Source Data file 2.

| Chromosome | <i>A. amarillo</i> | hybrids | <i>A. viridis</i> | <i>A. xiloaensis</i> | <i>A. sagittae</i> |
|------------|--------------------|---------|-------------------|----------------------|--------------------|
| 1          | 29                 | 5       | 0                 | 0                    | 1                  |
| 2          | 0                  | 0       | 0                 | 0                    | 0                  |
| 3          | 3                  | 0       | 0                 | 0                    | 1                  |
| 4          | 5                  | 7       | 1                 | 5                    | 0                  |
| 5          | 3                  | 0       | 0                 | 0                    | 0                  |
| 6          | 47                 | 0       | 2                 | 0                    | 0                  |
| 7          | 6                  | 0       | 4                 | 1                    | 0                  |
| 8          | 7                  | 0       | 0                 | 3                    | 0                  |
| 9          | 2                  | 0       | 0                 | 0                    | 0                  |
| 10         | 0                  | 2       | 0                 | 0                    | 0                  |
| 11         | 8                  | 0       | 0                 | 4                    | 0                  |
| 12         | 7                  | 1       | 0                 | 1                    | 0                  |
| 13         | 0                  | 0       | 0                 | 0                    | 0                  |
| 14         | 5                  | 0       | 3                 | 0                    | 0                  |
| 15         | 7                  | 0       | 1                 | 0                    | 0                  |
| 16         | 1                  | 2       | 4                 | 0                    | 0                  |
| 17         | 4                  | 1       | 0                 | 1                    | 0                  |
| 18         | 0                  | 18      | 0                 | 0                    | 0                  |
| 19         | 0                  | 0       | 1                 | 1                    | 0                  |
| 20         | 0                  | 2       | 0                 | 1                    | 0                  |
| 21         | 4                  | 0       | 0                 | 2                    | 0                  |
| 22         | 1                  | 0       | 2                 | 0                    | 0                  |
| 23         | 15                 | 0       | 6                 | 0                    | 0                  |
| 24         | 33                 | 0       | 0                 | 1                    | 0                  |
| Total      | 187                | 38      | 24                | 20                   | 2                  |

Supplementary information of the article “Early stages of sympatric homoploid hybrid speciation in crater lake cichlid fishes” by M. Olave, A. Nater, A. F. Kautt, A. Meyer. *Nature Communications* (2022).

Supplementary Table 3: Thirty-eight private SNPs found in eleven hybrids (frequency  $\geq 0.5$ ), their annotations, distance to the annotated gene, and information (using all Midas cichlids in CL Xiloá,  $n=95$ ) on per-site SNP quality (QUAL), depth per site summed across all individuals (SUM\_DEPTH and SUMSQ\_DEPTH), and the mean and variation in depth per site averaged across all individuals (MEAN\_DEPTH and VAR\_DEPTH). These same statistics are shown in reference to all SNPs across the genome in Supplementary Figure 1. Source data are provided in vcf format in Source Data file 2.

| CHR | Position | Type                    | Annotation                                                      | Distance (bp) | QUAL      | SUM_DEPTH | SUMSQ_DEPTH | MEAN_DEPTH | VAR_DEPTH |
|-----|----------|-------------------------|-----------------------------------------------------------------|---------------|-----------|-----------|-------------|------------|-----------|
| 1   | 30273478 | intergenic region       | Very long chain 3-oxoacyl-CoA reductase-B                       | 59948         | 3697.28   | 1788.00   | 37262.00    | 18.82      | 38.40     |
| 1   | 30274360 | intergenic region       | Very long chain 3-oxoacyl-CoA reductase-B                       | 60830         | 38670.20  | 1809.00   | 37607.00    | 19.04      | 33.62     |
| 1   | 30276999 | intergenic region       | Very long chain 3-oxoacyl-CoA reductase-B                       | 63469         | 35817.20  | 1746.00   | 35808.00    | 18.38      | 39.56     |
| 1   | 30279393 | intergenic region       | Very long chain 3-oxoacyl-CoA reductase-B                       | 65863         | 10340.30  | 1478.00   | 26950.00    | 15.56      | 42.08     |
| 1   | 30280072 | intergenic region       | Very long chain 3-oxoacyl-CoA reductase-B                       | 66542         | 7216.31   | 1297.00   | 21057.00    | 13.65      | 35.63     |
| 4   | 23365900 | missense variant        | WW domain-binding protein 2                                     | NA            | 3297.67   | 2027.00   | 47559.00    | 21.34      | 45.84     |
| 4   | 28266290 | intergenic region       | NA                                                              | 17692         | 4080.26   | 1647.00   | 33419.00    | 17.34      | 51.76     |
| 4   | 28326507 | downstream gene variant | Protein SCO1 homolog, mitochondrial                             | 600           | 2974.47   | 1875.00   | 39841.00    | 19.74      | 30.15     |
| 4   | 28385217 | intergenic region       | Growth arrest-specific protein 7                                | 28157         | 5120.13   | 2133.00   | 51589.00    | 22.45      | 39.34     |
| 4   | 28400388 | intergenic region       | Growth arrest-specific protein 7                                | 12986         | 6565.44   | 1966.00   | 43950.00    | 20.69      | 34.73     |
| 4   | 28414990 | intron variant          | Growth arrest-specific protein 7                                | 1493          | 7289.90   | 1814.00   | 38462.00    | 19.09      | 40.68     |
| 4   | 28523641 | 5 prime UTR variant     | Dual specificity mitogen-activated protein kinase kinase 4      | 6510          | 15316.10  | 1980.00   | 44790.00    | 20.84      | 37.47     |
| 10  | 27466499 | downstream gene variant | 55 kDa erythrocyte membrane protein                             | 2384          | 3855.22   | 1935.00   | 43035.00    | 20.37      | 38.53     |
| 10  | 27581197 | intergenic region       | Gamma-aminobutyric acid receptor subunit beta-4                 | 9040          | 3664.46   | 2016.00   | 45734.00    | 21.22      | 31.41     |
| 12  | 1133713  | intergenic region       | Serologically defined colon cancer antigen 3 homolog            | 10389         | 4073.07   | 2009.00   | 47189.00    | 21.15      | 50.04     |
| 16  | 35299454 | intergenic region       | Poly [ADP-ribose] polymerase 4                                  | 59747         | 3800.12   | 1973.00   | 43387.00    | 20.77      | 25.65     |
| 16  | 35405550 | intergenic region       | Titin                                                           | 163988        | 3607.78   | 1789.00   | 36347.00    | 18.83      | 28.27     |
| 17  | 14118258 | intergenic region       | mRNA-decapping enzyme 1B                                        | 21701         | 865.17    | 969.00    | 11637.00    | 10.20      | 18.65     |
| 18  | 12232293 | intergenic region       | RNA-binding Raly-like protein                                   | 9795          | 4100.28   | 2060.00   | 47696.00    | 21.68      | 32.20     |
| 18  | 12268414 | intron variant          | RNA-binding Raly-like protein                                   | 1898          | 4901.34   | 1923.00   | 42543.00    | 20.24      | 38.48     |
| 18  | 12271855 | intron variant          | RNA-binding Raly-like protein                                   | 5339          | 6497.46   | 1947.00   | 45229.00    | 20.49      | 56.66     |
| 18  | 12272707 | intron variant          | RNA-binding Raly-like protein                                   | 6191          | 169782.00 | 1519.00   | 27165.00    | 15.99      | 30.61     |
| 18  | 12272820 | intron variant          | RNA-binding Raly-like protein                                   | 6304          | 4628.54   | 1716.00   | 33980.00    | 18.06      | 31.74     |
| 18  | 12273625 | intron variant          | RNA-binding Raly-like protein                                   | 7109          | 6026.96   | 2008.00   | 45446.00    | 21.14      | 31.95     |
| 18  | 12273685 | intron variant          | RNA-binding Raly-like protein                                   | 7169          | 6397.05   | 2072.00   | 48494.00    | 21.81      | 35.13     |
| 18  | 12274867 | intron variant          | RNA-binding Raly-like protein                                   | 8351          | 27570.70  | 2124.00   | 50992.00    | 22.36      | 37.27     |
| 18  | 12275000 | intron variant          | RNA-binding Raly-like protein                                   | 8484          | 26925.20  | 2026.00   | 46646.00    | 21.33      | 36.58     |
| 18  | 12275314 | intron variant          | RNA-binding Raly-like protein                                   | 8798          | 24278.70  | 1913.00   | 41243.00    | 20.14      | 28.95     |
| 18  | 12275436 | intron variant          | RNA-binding Raly-like protein                                   | 8920          | 6629.32   | 2115.00   | 50377.00    | 22.26      | 35.00     |
| 18  | 12275475 | intron variant          | RNA-binding Raly-like protein                                   | 8959          | 24962.80  | 2079.00   | 48691.00    | 21.88      | 33.98     |
| 18  | 12276063 | intron variant          | RNA-binding Raly-like protein                                   | 9547          | 5616.11   | 1791.00   | 37223.00    | 18.85      | 36.79     |
| 18  | 12276106 | intron variant          | RNA-binding Raly-like protein                                   | 9590          | 18370.10  | 1949.00   | 42993.00    | 20.52      | 32.00     |
| 18  | 12276671 | intron variant          | RNA-binding Raly-like protein                                   | 10155         | 25102.60  | 2007.00   | 45445.00    | 21.13      | 32.39     |
| 18  | 12276760 | intron variant          | RNA-binding Raly-like protein                                   | 10244         | 6213.81   | 1981.00   | 44061.00    | 20.85      | 29.28     |
| 18  | 12281200 | intron variant          | RNA-binding Raly-like protein                                   | 302           | 6512.47   | 1634.00   | 31556.00    | 17.20      | 36.71     |
| 18  | 12334068 | 3 prime UTR variant     | Leucine-rich repeat and coiled-coil domain-containing protein 1 | 188           | 5264.95   | 1983.00   | 44141.00    | 20.87      | 29.24     |
| 20  | 13306510 | intron variant          | Cadherin-like protein 26                                        | 2602          | 5296.93   | 1766.00   | 36868.00    | 18.59      | 42.97     |
| 20  | 13310654 | intron variant          | Cadherin-like protein 26                                        | 6746          | 5194.84   | 1813.00   | 39695.00    | 19.08      | 54.21     |

Supplementary Table 4. Result of gene ontology (GO) enrichment analysis (for the 20 most statistically significant results), for private alleles in hybrids. Annotations used as input are shown in Supplementary Table 3.

| Enrichment FDR | N Genes | Pathway Genes | Fold Enrichment | Pathway                                                                   | Genes                |
|----------------|---------|---------------|-----------------|---------------------------------------------------------------------------|----------------------|
| 0.029          | 1       | 8             | 390.86          | Respiratory chain complex IV assembly                                     | sco1                 |
| 0.029          | 2       | 247           | 25.32           | Pos. reg. of metabolic proc.                                              | dcp1a wbp2           |
| 0.029          | 1       | 4             | 781.72          | Reg. of gene expression, epigenetic                                       | wbp2                 |
| 0.029          | 1       | 5             | 625.38          | Copper ion homeostasis                                                    | sco1                 |
| 0.029          | 1       | 8             | 390.86          | Nuclear-transcribed mRNA catabolic process, deadenylation-dependent decay | dcp1a                |
| 0.029          | 1       | 5             | 625.38          | Deadenylation-dependent decapping of nuclear-transcribed mRNA             | dcp1a                |
| 0.029          | 1       | 7             | 446.70          | RNA decapping                                                             | dcp1a                |
| 0.029          | 1       | 7             | 446.70          | Methylguanosine-cap decapping                                             | dcp1a                |
| 0.029          | 1       | 3             | 1042.30         | Cellular copper ion homeostasis                                           | sco1                 |
| 0.031          | 1       | 10            | 312.69          | RNA destabilization                                                       | dcp1a                |
| 0.031          | 1       | 10            | 312.69          | MRNA destabilization                                                      | dcp1a                |
| 0.031          | 1       | 12            | 260.57          | Cytochrome complex assembly                                               | sco1                 |
| 0.031          | 1       | 11            | 284.26          | Pos. reg. of mRNA catabolic proc.                                         | dcp1a                |
| 0.034          | 1       | 14            | 223.35          | Cellular response to estrogen stimulus                                    | wbp2                 |
| 0.037          | 3       | 1305          | 7.19            | Reg. of biosynthetic proc.                                                | dcp1a Irrcc1<br>wbp2 |
| 0.037          | 3       | 1270          | 7.39            | Reg. of nucleobase-containing compound metabolic proc.                    | dcp1a Irrcc1<br>wbp2 |
| 0.037          | 1       | 17            | 183.93          | Response to estrogen                                                      | wbp2                 |
| 0.037          | 1       | 23            | 135.95          | Reg. of RNA stability                                                     | dcp1a                |
| 0.038          | 3       | 1415          | 6.63            | Reg. of gene expression                                                   | dcp1a Irrcc1<br>wbp2 |
| 0.038          | 1       | 28            | 111.67          | Neg. reg. of translation                                                  | dcp1a                |

Supplementary information of the article “Early stages of sympatric homoploid hybrid speciation in crater lake cichlid fishes” by M. Olave, A. Nater, A. F. Kautt, A. Meyer. *Nature Communications* (2022).

Supplementary Table 5: Frequency of private alleles found in hybrids, compared to all other available Midas cichlid genomes taken from Kautt et al. (2020; Nature). Eight SNPs only found in hybrids and backcrosses are highlighted in grey. Total sampling = 453 individuals. Abbreviations: CHR: chromosome, POS: position, N: Number of individuals samples per species/group shown on right row, xil: *A. xiloaensis*, BC\_xil: *A. xiloaensis* backcrosses, hyb: hybrids, BC\_sag: *A. sagittae* backcross, sag: *A. sagittae*, ama: *A. amarillo*, vir: *A. viridis*, cit: *A. citrinellus*, lab: *A. labiatus*, ast: *A. astorqui*, cha: *A. chancho*, fla: *A. flaveolus*, glo: *A. globosus*, sup: *A. superciliosus*, zal: *A. zaliosus*, tol: *A. tolteca*. Source data available in Source Data file 1.

| CHR      | Lake     | CL Xiloá |      |        |      |        |     |      | Managua |      | Nicaragua |      | CL Apoyo |      |      |      |      |      | CL As Leon | CL As Managua | CL Apoyeque | CL Masaya | Tiscapa |      |   |
|----------|----------|----------|------|--------|------|--------|-----|------|---------|------|-----------|------|----------|------|------|------|------|------|------------|---------------|-------------|-----------|---------|------|---|
|          |          | Species  | xil  | BC_xil | hyb  | BC_sag | sag | ama  | vir     | cit  | lab       | cit  | lab      | ast  | cha  | fla  | glo  | sup  | zal        | cit           | tol         | cit       | cit     | cit  |   |
|          | POS/N    | 10       | 7    | 11     | 14   | 13     | 21  | 19   | 25      | 25   | 24        | 24   | 23       | 23   | 17   | 26   | 10   | 21   | 20         | 20            | 40          | 40        | 20      |      |   |
| 1        | 30273478 | -        | 0.14 | 0.59   | 0.04 | -      | -   | -    | -       | -    | -         | -    | -        | -    | -    | -    | -    | -    | -          | -             | -           | -         | -       |      |   |
|          | 30274360 | -        | 0.14 | 0.59   | 0.04 | -      | -   | -    | 0.18    | 0.10 | 0.04      | 0.23 | 0.43     | 0.28 | 0.06 | 0.06 | 0.25 | 0.02 | 0.63       | -             | -           | -         | 0.10    | 0.03 |   |
|          | 30276999 | -        | 0.07 | 0.50   | 0.04 | -      | -   | -    | 0.18    | 0.12 | 0.10      | 0.21 | 0.48     | 0.28 | 0.12 | 0.10 | 0.25 | 0.07 | 0.63       | -             | -           | -         | 0.10    | 0.03 |   |
|          | 30279393 | -        | 0.14 | 0.55   | 0.04 | -      | -   | -    | 0.06    | 0.02 | 0.04      | 0.15 | -        | 0.04 | -    | -    | -    | -    | -          | -             | -           | -         | -       | 0.10 | - |
|          | 30280072 | -        | 0.14 | 0.50   | 0.04 | -      | -   | -    | 0.08    | 0.02 | 0.04      | 0.15 | -        | -    | -    | -    | -    | -    | -          | -             | -           | -         | -       | 0.10 | - |
| 4        | 23365900 | -        | 0.07 | 0.55   | -    | -      | -   | -    | 0.02    | -    | -         | -    | -        | -    | -    | -    | -    | -    | -          | -             | -           | -         | -       | -    | - |
|          | 28266290 | -        | 0.07 | 0.59   | 0.04 | -      | -   | -    | -       | -    | -         | -    | -        | -    | -    | -    | -    | -    | -          | -             | -           | -         | -       | -    | - |
|          | 28326507 | -        | 0.07 | 0.59   | 0.04 | -      | -   | -    | 0.04    | -    | 0.04      | 0.04 | 0.02     | -    | 0.03 | 0.04 | -    | -    | -          | -             | -           | -         | -       | 0.03 | - |
|          | 28385217 | -        | 0.14 | 0.59   | 0.04 | -      | -   | -    | -       | -    | -         | -    | -        | -    | -    | -    | -    | -    | -          | -             | -           | -         | -       | -    | - |
|          | 28400388 | -        | 0.14 | 0.64   | 0.04 | -      | -   | -    | 0.02    | -    | -         | 0.02 | -        | -    | -    | -    | -    | -    | -          | -             | 0.10        | -         | -       | -    | - |
|          | 28414990 | -        | 0.14 | 0.59   | 0.04 | -      | -   | -    | -       | 0.06 | -         | -    | -        | -    | -    | -    | -    | -    | -          | -             | 0.05        | -         | -       | 0.19 | - |
| 28523641 | -        | 0.14     | 0.68 | 0.04   | -    | -      | -   | 0.06 | 0.08    | 0.02 | 0.02      | 0.04 | 0.02     | 0.15 | 0.19 | -    | -    | -    | -          | -             | -           | -         | 0.11    | -    |   |
| 10       | 27466499 | -        | -    | 0.59   | 0.04 | -      | -   | -    | -       | -    | -         | -    | -        | -    | -    | -    | -    | -    | -          | -             | -           | -         | -       | -    | - |
|          | 27581197 | -        | -    | 0.55   | -    | -      | -   | -    | -       | -    | -         | -    | -        | -    | -    | -    | -    | -    | -          | -             | -           | -         | -       | -    | - |
| 12       | 1133713  | -        | 0.07 | 0.50   | 0.18 | -      | -   | -    | -       | 0.02 | -         | -    | -        | -    | -    | -    | -    | -    | -          | -             | 0.03        | -         | -       | -    | - |
| 16       | 35299454 | -        | 0.07 | 0.55   | -    | -      | -   | -    | -       | -    | -         | -    | -        | -    | -    | -    | -    | -    | -          | -             | -           | -         | -       | -    | - |
|          | 35405550 | -        | 0.07 | 0.55   | -    | -      | -   | -    | 0.02    | -    | 0.02      | -    | -        | -    | -    | -    | -    | -    | -          | -             | -           | -         | -       | -    | - |
| 17       | 14118258 | -        | -    | 0.50   | 0.07 | -      | -   | -    | -       | -    | -         | -    | -        | 0.02 | -    | -    | -    | -    | -          | -             | -           | -         | -       | -    | - |
| 18       | 12232293 | -        | -    | 0.55   | 0.04 | -      | -   | -    | -       | -    | -         | -    | -        | -    | -    | -    | -    | -    | -          | -             | -           | -         | -       | -    | - |
|          | 12268414 | -        | -    | 0.55   | 0.04 | -      | -   | -    | 0.04    | -    | 0.06      | 0.08 | -        | -    | -    | -    | -    | -    | -          | -             | -           | 0.01      | -       | -    | - |
|          | 12271855 | -        | -    | 0.55   | 0.04 | -      | -   | -    | 0.04    | -    | 0.06      | 0.08 | -        | -    | -    | -    | -    | -    | -          | -             | -           | -         | -       | -    | - |
|          | 12272707 | -        | -    | 0.55   | 0.07 | -      | -   | -    | 0.04    | -    | 0.06      | 0.08 | -        | -    | -    | -    | -    | -    | -          | -             | -           | -         | -       | -    | - |
|          | 12272820 | -        | -    | 0.55   | 0.04 | -      | -   | -    | 0.04    | -    | 0.06      | 0.08 | -        | -    | -    | -    | -    | -    | -          | -             | -           | -         | -       | -    | - |
|          | 12273625 | -        | -    | 0.50   | 0.04 | -      | -   | -    | 0.04    | -    | 0.04      | 0.08 | -        | -    | -    | -    | -    | -    | -          | -             | -           | -         | -       | -    | - |
|          | 12273685 | -        | -    | 0.55   | 0.04 | -      | -   | -    | 0.04    | -    | 0.06      | 0.08 | -        | -    | -    | -    | -    | -    | -          | -             | -           | -         | -       | -    | - |
|          | 12274867 | -        | -    | 0.55   | 0.04 | -      | -   | -    | 0.04    | -    | 0.08      | 0.13 | -        | -    | -    | -    | -    | -    | -          | -             | -           | -         | -       | 0.01 | - |
|          | 12275000 | -        | -    | 0.55   | 0.04 | -      | -   | -    | 0.04    | -    | 0.06      | 0.13 | -        | -    | -    | -    | -    | -    | -          | -             | -           | -         | -       | -    | - |
|          | 12275314 | -        | -    | 0.55   | 0.04 | -      | -   | -    | 0.04    | -    | 0.08      | 0.15 | -        | -    | -    | -    | -    | -    | -          | -             | -           | -         | -       | -    | - |
|          | 12275436 | -        | -    | 0.55   | 0.04 | -      | -   | -    | 0.04    | -    | 0.08      | 0.13 | -        | -    | -    | -    | -    | -    | -          | -             | -           | -         | -       | -    | - |
|          | 12275475 | -        | -    | 0.55   | 0.04 | -      | -   | -    | 0.04    | -    | 0.08      | 0.13 | -        | -    | -    | -    | -    | -    | -          | -             | -           | -         | -       | -    | - |
|          | 12276063 | -        | -    | 0.55   | 0.04 | -      | -   | -    | 0.04    | -    | 0.08      | 0.10 | -        | -    | -    | -    | -    | -    | -          | -             | -           | -         | -       | -    | - |
|          | 12276106 | -        | -    | 0.55   | 0.04 | -      | -   | -    | 0.04    | -    | 0.08      | 0.10 | 0.02     | -    | -    | -    | -    | -    | -          | -             | -           | -         | -       | -    | - |
|          | 12276671 | -        | -    | 0.50   | 0.04 | -      | -   | -    | 0.04    | -    | 0.08      | 0.13 | -        | -    | -    | -    | -    | -    | -          | -             | -           | -         | -       | -    | - |
| 12276760 | -        | -        | 0.55 | 0.04   | -    | -      | -   | 0.04 | -       | 0.08 | 0.13      | -    | -        | -    | -    | -    | -    | -    | -          | -             | -           | -         | -       | -    |   |
| 12281200 | -        | -        | 0.50 | 0.04   | -    | -      | -   | 0.06 | -       | 0.17 | 0.10      | -    | -        | -    | -    | -    | -    | -    | -          | -             | -           | -         | -       | -    |   |
| 12334068 | -        | -        | 0.55 | 0.18   | -    | -      | -   | -    | -       | -    | -         | -    | -        | -    | -    | -    | -    | -    | -          | -             | -           | -         | -       | -    |   |
| 20       | 13306510 | -        | -    | 0.50   | 0.14 | -      | -   | -    | 0.02    | -    | -         | -    | -        | -    | -    | -    | -    | -    | -          | 0.03          | 0.01        | 0.04      | -       | -    |   |
|          | 13310654 | -        | 0.07 | 0.50   | 0.14 | -      | -   | -    | -       | -    | -         | -    | -        | -    | -    | -    | -    | -    | -          | 0.03          | -           | 0.04      | -       | -    |   |

Supplementary Table 6. Summary statistics of inbreeding coefficient calculated along the genome (2,510,628 SNPs  $\pm$  31,789.87) on a per-individual basis using vcftools (F-statistic = 1 – observed heterozygosity / expected heterozygosity). Data source is available in Source Data file 1.

| Group                                       | Mean F-statistic $\pm$ s.d. |
|---------------------------------------------|-----------------------------|
| hybrids (n = 11)                            | -0.12268 $\pm$ 0.204        |
| <i>A. sagittae</i> (n=13)                   | -0.06182 $\pm$ 0.073        |
| <i>A. sagittae</i> + backcrosses (n = 27)   | -0.0494 $\pm$ 0.064         |
| <i>A. xiloaensis</i> (n=10)                 | 0.0025 $\pm$ 0.054          |
| <i>A. xiloaensis</i> + backcrosses (n = 17) | -0.0565 $\pm$ 0.158         |

Supplementary Table 7: Fifty-two diagnostic SNPs found in pure the parental species *A. xiloensis* (n=10) and *A. sagittae* (n=13). Raw data is available in vcf format in Source Data file 2.

| Chromosome | Position | Annotation                                            |
|------------|----------|-------------------------------------------------------|
| 4          | 5969572  | GTPase IMAP family member 8                           |
| 4          | 5976617  | GTPase IMAP family member 8                           |
| 4          | 5977655  | GTPase IMAP family member 8                           |
| 4          | 5978898  | GTPase IMAP family member 8                           |
| 4          | 5980671  | NA                                                    |
| 4          | 5987109  | NA                                                    |
| 4          | 5998204  | Band 3 anion exchange protein                         |
| 4          | 5998485  | Band 3 anion exchange protein                         |
| 4          | 6000454  | Band 3 anion exchange protein                         |
| 4          | 6001793  | Band 3 anion exchange protein                         |
| 4          | 6019112  | Ataxin-7-like protein 3                               |
| 6          | 25501645 | NA                                                    |
| 8          | 11737616 | NA                                                    |
| 8          | 19406239 | Tumor necrosis factor receptor superfamily member 16  |
| 8          | 19416369 | Alpha-tectorin                                        |
| 11         | 27820225 | CTP synthase 1                                        |
| 11         | 38567601 | Activating signal cointegrator 1 complex subunit 3    |
| 11         | 38567605 | Activating signal cointegrator 1 complex subunit 3    |
| 12         | 31358111 | Semaphorin-6A                                         |
| 14         | 38750901 | FRAS1-related extracellular matrix protein 2          |
| 14         | 38751714 | FRAS1-related extracellular matrix protein 2          |
| 14         | 38751885 | FRAS1-related extracellular matrix protein 2          |
| 14         | 38763047 | Tripartite motif-containing protein 3                 |
| 14         | 38983846 | T-lymphoma invasion and metastasis-inducing protein 1 |
| 14         | 38986480 | T-lymphoma invasion and metastasis-inducing protein 1 |
| 14         | 38996405 | T-lymphoma invasion and metastasis-inducing protein 1 |
| 14         | 38997403 | T-lymphoma invasion and metastasis-inducing protein 1 |
| 14         | 39003955 | T-lymphoma invasion and metastasis-inducing protein 1 |
| 14         | 39004000 | T-lymphoma invasion and metastasis-inducing protein 1 |
| 16         | 6809063  | Tomoregulin-2                                         |
| 16         | 6810658  | Tomoregulin-2                                         |
| 16         | 6810686  | Tomoregulin-2                                         |
| 16         | 6812564  | Tomoregulin-2                                         |
| 16         | 6814390  | Tomoregulin-2                                         |
| 16         | 6814819  | Tomoregulin-2                                         |
| 16         | 6818333  | Tomoregulin-2                                         |
| 17         | 13684620 | ELKS/Rab6-interacting/CAST family member 1            |
| 17         | 13687285 | ELKS/Rab6-interacting/CAST family member 1            |
| 17         | 13690820 | ELKS/Rab6-interacting/CAST family member 1            |
| 20         | 28125727 | Serine/threonine-protein kinase mTOR                  |
| 20         | 28135238 | Agrin                                                 |
| 20         | 28148990 | Agrin                                                 |
| 20         | 28151399 | Agrin                                                 |
| 24         | 23949788 | Phospholipid-transporting ATPase IC                   |
| 24         | 23961967 | Phospholipid-transporting ATPase IC                   |
| 24         | 24080633 | Zinc finger and BTB domain-containing protein 7A      |
| 24         | 24098249 | Transcription factor E2-alpha                         |
| 24         | 32563684 | Myomegalin                                            |
| 24         | 32609243 | Myomegalin                                            |
| 24         | 32611777 | Myomegalin                                            |
| 24         | 32618410 | Myomegalin                                            |
| 24         | 32618606 | Myomegalin                                            |



Supplementary Table 8: Result of gene ontology (GO) enrichment analysis (20 lowest enrichment FDR), for annotations in fixed SNPs in parental species. Annotation used as input are listed in Supplementary Fig. 3.

| Enrichment FDR | nGenes | Pathway Genes | Fold Enrichment | Pathway                                                    | Genes                          |
|----------------|--------|---------------|-----------------|------------------------------------------------------------|--------------------------------|
| 0.101          | 1      | 4             | 390.86          | Histone deubiquitination                                   | ATXN7L3                        |
| 0.101          | 1      | 5             | 312.69          | Reg. of myelination                                        | mtor                           |
| 0.101          | 1      | 3             | 521.15          | Pos. reg. of myelination                                   | mtor                           |
| 0.101          | 1      | 5             | 312.69          | Reg. of nervous system proc.                               | mtor                           |
| 0.101          | 1      | 3             | 521.15          | Otolith tethering                                          | tecta                          |
| 0.101          | 1      | 4             | 390.86          | Activation of GTPase activity                              | tiam1b                         |
| 0.104          | 1      | 6             | 260.57          | Receptor clustering                                        | agnr                           |
| 0.104          | 1      | 9             | 173.72          | Skin development                                           | mtor                           |
| 0.104          | 5      | 1977          | 3.95            | System development                                         | slc4a1a mtor agnr tecta ctps1b |
| 0.104          | 1      | 11            | 142.13          | Acetylcholine receptor signaling pathway                   | agnr                           |
| 0.104          | 1      | 11            | 142.13          | Postsynaptic signal transduction                           | agnr                           |
| 0.104          | 1      | 11            | 142.13          | Response to acetylcholine                                  | agnr                           |
| 0.104          | 1      | 11            | 142.13          | Cellular response to acetylcholine                         | agnr                           |
| 0.104          | 1      | 11            | 142.13          | G protein-coupled acetylcholine receptor signaling pathway | agnr                           |
| 0.104          | 1      | 17            | 91.97           | Pyrimidine nucleoside triphosphate metabolic proc.         | ctps1b                         |
| 0.104          | 1      | 15            | 104.23          | Pyrimidine ribonucleoside triphosphate biosynthetic proc.  | ctps1b                         |
| 0.104          | 1      | 15            | 104.23          | CTP metabolic proc.                                        | ctps1b                         |
| 0.104          | 2      | 246           | 12.71           | Nervous system proc.                                       | mtor tecta                     |
| 0.104          | 1      | 15            | 104.23          | CTP biosynthetic proc.                                     | ctps1b                         |
| 0.104          | 1      | 17            | 91.97           | Glutamine metabolic proc.                                  | ctps1b                         |

Supplementary Table 9: Linear model (two sided F-test) results for ancestry tract length comparisons of hybrids and backcrosses, based on medians obtained per individual and their donors. Model: median ancestry tract lengths ~ group\*donor; F = 12.76 on 5 and 58 DF, p-value =  $2.24 \times 10^{-8}$ \*\*\*. Source Data is available in Source Date file 1.

|                                                  | Estimate | Std. Error | t value | p-value                   |
|--------------------------------------------------|----------|------------|---------|---------------------------|
| (Intercept)                                      | 21852    | 2296       | 9.518   | $1.8 \times 10^{-13}$ *** |
| A. sagittae (backcrosses)                        | 15568    | 3068       | 5.074   | $4.3 \times 10^{-6}$ ***  |
| A. xiloaensis (backcrosses)                      | -8786    | 3682       | -2.386  | 0.02030*                  |
| A. xiloaensis donor                              | 5056     | 3247       | 1.557   | 0.12490                   |
| A. sagittae (backcrosses): A. xiloaensis donor   | -20042   | 4339       | -4.619  | $2.1 \times 10^{-5}$ ***  |
| A. xiloaensis (backcrosses): A. xiloaensis donor | 14887    | 5207       | 2.859   | 0.00589**                 |

Residual standard error: 7615 on 58 degrees of freedom  
Multiple R-squared: 0.5239, Adjusted R-squared: 0.4828  
F-statistic: 12.76 on 5 and 58 DF, p-value  $1.24 \times 10^{-10}$

Supplementary Table 10: Two-sided t-test results for standard length (SL) comparisons among hybrids and the two parental species. Source Data is available in Source Data file 1.

| Excluding backcrosses                           | n  | t-value | p-value |
|-------------------------------------------------|----|---------|---------|
| <i>A. sagittae</i>                              | 13 | 1.367   | 0.181   |
| <i>A. xiloaensis</i>                            | 10 | -0.403  | 0.689   |
| Model df = 31; p = 0.1912; F-statistic = 1.74   |    |         |         |
| Including backcrosses                           |    |         |         |
| <i>A. sagittae</i> + backcrosses                | 27 | 0.415   | 0.68    |
| <i>A. xiloaensis</i> + backcrosses              | 17 | 0.136   | 0.892   |
| Model df = 52; p = 0.9028; F-statistic = 0.1025 |    |         |         |

Supplementary Table 11: Linear model (two sided F-test) results for caudal depth (LM6-12, SL corrected) comparisons among hybrids and the two parental species and backcrosses.

| Excluding backcrosses                                               | n  | t-value | p-value                   |
|---------------------------------------------------------------------|----|---------|---------------------------|
| <i>A. sagittae</i>                                                  | 13 | -4.602  | 7.15 x10 <sup>-5***</sup> |
| <i>A. xiloaensis</i>                                                | 10 | -2.437  | 0.021*                    |
| SL co-variable                                                      |    | 10.174  | 3.1 x10 <sup>-11***</sup> |
| Model df = 30; p = 2.39 x10 <sup>-10***</sup> ; F-statistic = 38.05 |    |         |                           |
| Pure parental + backcrosses                                         |    |         |                           |
| <i>A. sagittae</i> + backcrosses                                    | 27 | -5.776  | 4.6 x10 <sup>-7***</sup>  |
| <i>A. xiloaensis</i> + backcrosses                                  | 17 | -3.132  | 0.00288**                 |
| SL co-variable                                                      |    | 13.222  | 2.2 x10 <sup>-16***</sup> |
| Model df = 51; p = 2.2 x10 <sup>-16***</sup> ; F-statistic = 66.79  |    |         |                           |
| All as separate groups                                              |    |         |                           |
| <i>A. sagittae</i> (backcrosses)                                    | 14 | -4.934  | 9.7 x10 <sup>-7***</sup>  |
| <i>A. xiloaensis</i> (backcrosses)                                  | 7  | -2.419  | 0.0193*                   |
| <i>A. sagittae</i>                                                  | 13 | -4.9334 | 9.7 x10 <sup>-7***</sup>  |
| <i>A. xiloaensis</i>                                                | 10 | -2.733  | 0.0087**                  |
| SL co-variable                                                      |    | 12.220  | 2.2 x10 <sup>-16***</sup> |
| Model df = 49; p = 2.2 x10 <sup>-16***</sup> ; F-statistic = 38.53  |    |         |                           |
